# Supplementary material for: Functional Characterisation of the Circular RNA, circHTT(2-6), in Huntington’s Disease
Source: Cells. 2023 May 7;12(9):1337. doi: 10.3390/cells12091337 (PMC10177161; doi:10.3390/cells12091337)
Supplement: Supplementary file 1 [file cells-12-01337-s001.zip › Supplementary Table S2.xlsx]

## Sheet: Human HTT circRNAs
circID	Species	Gene	Isoform	Location	Strand	FPM	Exon Start-Exon End	Seq Type	Cell Line	Conservation	Mapsplice
HSA_CIRCpedia_48392	Human (hg38)	HTT	ENST00000355072.9	Chr4:3086938â€“3107423	+	0.155	2-6	poly(A)-	AG04450	MMU_CIRCpedia_17475	Yes
HSA_CIRCpedia_48434	Human (hg38)	HTT	ENST00000355072.9	Chr4:3186596â€“3189093	+	0.11	38-40	poly(A)-	AG04450	Species-specific	Yes
HSA_CIRCpedia_48435	Human (hg38)	HTT	ENST00000355072.9	Chr4:3186596â€“3199939	+	0.058	38-41	poly(A)-	AG04450	Species-specific	Yes
HSA_CIRCpedia_48430	Human (hg38)	HTT	ENST00000355072.9	Chr4:3182353â€“3189093	+	0.025	37-40	poly(A)-	AG04450	Species-specific	No
HSA_CIRCpedia_48432	Human (hg38)	HTT	ENST00000355072.9	Chr4:3182353â€“3204148	+	0.019	37-42	poly(A)-	AG04450	Species-specific	No
HSA_CIRCpedia_48393	Human (hg38)	HTT	ENST00000355072.9	Chr4:3086938â€“3116263	+	0.019	2-8	poly(A)-	AG04450	Species-specific	No
HSA_CIRCpedia_48419	Human (hg38)	HTT	ENST00000355072.9	Chr4:3142765â€“3160392	+	0.012	23-29	poly(A)-	AG04450	Species-specific	No
HSA_CIRCpedia_48410	Human (hg38)	HTT	ENST00000355072.9	Chr4:3115303â€“3148207	+	0.012	7-26	poly(A)-	AG04450	Species-specific	No
HSA_CIRCpedia_48436	Human (hg38)	HTT	ENST00000355072.9	Chr4:3186596â€“3204148	+	0.012	38-42	poly(A)-	AG04450	Species-specific	No
HSA_CIRCpedia_48388	Human (hg38)	HTT	ENST00000355072.9	Chr4:3086938â€“3087022	+	0.012	2-2	poly(A)-	AG04450	Species-specific	No
HSA_CIRCpedia_102723	Human (hg38)	HTT	ENST00000355072.9	Chr4:3115303â€“3136326	+	0.006	7-21	poly(A)-	AG04450	Species-specific	No
HSA_CIRCpedia_123792	Human (hg38)	HTT	ENST00000355072.9	Chr4:3174720â€“3199939	+	0.006	32-41	poly(A)-	AG04450	Species-specific	No
HSA_CIRCpedia_341848	Human (hg38)	HTT	ENST00000355072.9	Chr4:3086938â€“3177387	+	0.006	2-34	poly(A)-	AG04450	Species-specific	No
HSA_CIRCpedia_48433	Human (hg38)	HTT	ENST00000355072.9	Chr4:3186596â€“3186719	+	0.006	38-38	poly(A)-	AG04450	Species-specific	No
HSA_CIRCpedia_341849	Human (hg38)	HTT	ENST00000355072.9	Chr4:3145151â€“3204148	+	0.006	24-42	poly(A)-	AG04450	Species-specific	No
HSA_CIRCpedia_48394	Human (hg38)	HTT	ENST00000355072.9	Chr4:3086938â€“3121432	+	0.006	2-9	poly(A)-	AG04450	Species-specific	No
HSA_CIRCpedia_48435	Human (hg38)	HTT	ENST00000355072.9	Chr4:3186596â€“3199939	+	0.093	38-41	poly(A)-	BJ	Species-specific	No
HSA_CIRCpedia_48392	Human (hg38)	HTT	ENST00000355072.9	Chr4:3086938â€“3107423	+	0.057	2-6	poly(A)-	BJ	MMU_CIRCpedia_17475	Yes
HSA_CIRCpedia_48389	Human (hg38)	HTT	ENST00000355072.9	Chr4:3086938â€“3099394	+	0.021	2-3	poly(A)-	BJ	Species-specific	No
HSA_CIRCpedia_48430	Human (hg38)	HTT	ENST00000355072.9	Chr4:3182353â€“3189093	+	0.007	37-40	poly(A)-	BJ	Species-specific	No
HSA_CIRCpedia_48392	Human (hg38)	HTT	ENST00000355072.9	Chr4:3086938â€“3107423	+	0.411	2-6	Ribo-	Cerebellum	MMU_CIRCpedia_17475	Yes
HSA_CIRCpedia_48423	Human (hg38)	HTT	ENST00000355072.9	Chr4:3154292â€“3157199	+	0.102	27-28	Ribo-	Cerebellum	MMU_CIRCpedia_212182	Yes
HSA_CIRCpedia_48434	Human (hg38)	HTT	ENST00000355072.9	Chr4:3186596â€“3189093	+	0.074	38-40	Ribo-	Cerebellum	Species-specific	Yes
HSA_CIRCpedia_48435	Human (hg38)	HTT	ENST00000355072.9	Chr4:3186596â€“3199939	+	0.046	38-41	Ribo-	Cerebellum	Species-specific	Yes
HSA_CIRCpedia_48440	Human (hg38)	HTT	ENST00000355072.9	Chr4:3206495â€“3209949	+	0.037	43-47	Ribo-	Cerebellum	Species-specific	Yes
HSA_CIRCpedia_48431	Human (hg38)	HTT	ENST00000355072.9	Chr4:3182353â€“3199939	+	0.028	37-41	Ribo-	Cerebellum	Species-specific	No
HSA_CIRCpedia_48404	Human (hg38)	HTT	ENST00000355072.9	Chr4:3099273â€“3107423	+	0.028	3-6	Ribo-	Cerebellum	MMU_CIRCpedia_223381	Yes
HSA_CIRCpedia_48433	Human (hg38)	HTT	ENST00000355072.9	Chr4:3186596â€“3186719	+	0.018	38-38	Ribo-	Cerebellum	Species-specific	No
HSA_CIRCpedia_123791	Human (hg38)	HTT	ENST00000355072.9	Chr4:3103823â€“3115445	+	0.009	4-7	Ribo-	Cerebellum	Species-specific	No
HSA_CIRCpedia_102734	Human (hg38)	HTT	ENST00000355072.9	Chr4:3154292â€“3160392	+	0.009	27-29	Ribo-	Cerebellum	MMU_CIRCpedia_226010	No
HSA_CIRCpedia_123792	Human (hg38)	HTT	ENST00000355072.9	Chr4:3174720â€“3199939	+	0.009	32-41	Ribo-	Cerebellum	Species-specific	No
HSA_CIRCpedia_48392	Human (hg38)	HTT	ENST00000355072.9	Chr4:3086938â€“3107423	+	2.307	2-6	Ribo-	Cortex	MMU_CIRCpedia_17475	Yes
HSA_CIRCpedia_48423	Human (hg38)	HTT	ENST00000355072.9	Chr4:3154292â€“3157199	+	1.528	27-28	Ribo-	Cortex	MMU_CIRCpedia_212182	Yes
HSA_CIRCpedia_48405	Human (hg38)	HTT	ENST00000355072.9	Chr4:3103823â€“3107423	+	0.628	4-6	Ribo-	Cortex	Species-specific	Yes
HSA_CIRCpedia_48434	Human (hg38)	HTT	ENST00000355072.9	Chr4:3186596â€“3189093	+	0.487	38-40	Ribo-	Cortex	Species-specific	Yes
HSA_CIRCpedia_48404	Human (hg38)	HTT	ENST00000355072.9	Chr4:3099273â€“3107423	+	0.225	3-6	Ribo-	Cortex	MMU_CIRCpedia_223381	Yes
HSA_CIRCpedia_102734	Human (hg38)	HTT	ENST00000355072.9	Chr4:3154292â€“3160392	+	0.103	27-29	Ribo-	Cortex	MMU_CIRCpedia_226010	Yes
HSA_CIRCpedia_48412	Human (hg38)	HTT	ENST00000355072.9	Chr4:3122888â€“3125629	+	0.075	10-11	Ribo-	Cortex	Species-specific	Yes
HSA_CIRCpedia_48435	Human (hg38)	HTT	ENST00000355072.9	Chr4:3186596â€“3199939	+	0.075	38-41	Ribo-	Cortex	Species-specific	Yes
HSA_CIRCpedia_48393	Human (hg38)	HTT	ENST00000355072.9	Chr4:3086938â€“3116263	+	0.056	2-8	Ribo-	Cortex	Species-specific	Yes
HSA_CIRCpedia_48431	Human (hg38)	HTT	ENST00000355072.9	Chr4:3182353â€“3199939	+	0.046	37-41	Ribo-	Cortex	Species-specific	Yes
HSA_CIRCpedia_48440	Human (hg38)	HTT	ENST00000355072.9	Chr4:3206495â€“3209949	+	0.028	43-47	Ribo-	Cortex	Species-specific	No
HSA_CIRCpedia_48390	Human (hg38)	HTT	ENST00000355072.9	Chr4:3086938â€“3103883	+	0.028	2-4	Ribo-	Cortex	Species-specific	No
HSA_CIRCpedia_48389	Human (hg38)	HTT	ENST00000355072.9	Chr4:3086938â€“3099394	+	0.028	2-3	Ribo-	Cortex	Species-specific	Yes
HSA_CIRCpedia_48391	Human (hg38)	HTT	ENST00000355072.9	Chr4:3086938â€“3105436	+	0.018	2-5	Ribo-	Cortex	MMU_CIRCpedia_17474	No
HSA_CIRCpedia_137138	Human (hg38)	HTT	ENST00000355072.9	Chr4:3132561â€“3134540	+	0.009	17-19	Ribo-	Cortex	Species-specific	No
HSA_CIRCpedia_137140	Human (hg38)	HTT	ENST00000355072.9	Chr4:3217764â€“3220308	+	0.009	52-53	Ribo-	Cortex	Species-specific	No
HSA_CIRCpedia_102722	Human (hg38)	HTT	ENST00000355072.9	Chr4:3103823â€“3116263	+	0.009	4-8	Ribo-	Cortex	MMU_CIRCpedia_214889	No
HSA_CIRCpedia_137139	Human (hg38)	HTT	ENST00000355072.9	Chr4:3157071â€“3160392	+	0.009	28-29	Ribo-	Cortex	Species-specific	No
HSA_CIRCpedia_48392	Human (hg38)	HTT	ENST00000355072.9	Chr4:3086938â€“3107423	+	1.861	2-6	Ribo-	Diencephalon	MMU_CIRCpedia_17475	Yes
HSA_CIRCpedia_48423	Human (hg38)	HTT	ENST00000355072.9	Chr4:3154292â€“3157199	+	0.548	27-28	Ribo-	Diencephalon	MMU_CIRCpedia_212182	Yes
HSA_CIRCpedia_48405	Human (hg38)	HTT	ENST00000355072.9	Chr4:3103823â€“3107423	+	0.375	4-6	Ribo-	Diencephalon	Species-specific	Yes
HSA_CIRCpedia_48434	Human (hg38)	HTT	ENST00000355072.9	Chr4:3186596â€“3189093	+	0.274	38-40	Ribo-	Diencephalon	Species-specific	Yes
HSA_CIRCpedia_48404	Human (hg38)	HTT	ENST00000355072.9	Chr4:3099273â€“3107423	+	0.115	3-6	Ribo-	Diencephalon	MMU_CIRCpedia_223381	Yes
HSA_CIRCpedia_48435	Human (hg38)	HTT	ENST00000355072.9	Chr4:3186596â€“3199939	+	0.115	38-41	Ribo-	Diencephalon	Species-specific	Yes
HSA_CIRCpedia_48389	Human (hg38)	HTT	ENST00000355072.9	Chr4:3086938â€“3099394	+	0.057	2-3	Ribo-	Diencephalon	Species-specific	Yes
HSA_CIRCpedia_48431	Human (hg38)	HTT	ENST00000355072.9	Chr4:3182353â€“3199939	+	0.057	37-41	Ribo-	Diencephalon	Species-specific	No
HSA_CIRCpedia_48393	Human (hg38)	HTT	ENST00000355072.9	Chr4:3086938â€“3116263	+	0.043	2-8	Ribo-	Diencephalon	Species-specific	No
HSA_CIRCpedia_48390	Human (hg38)	HTT	ENST00000355072.9	Chr4:3086938â€“3103883	+	0.043	2-4	Ribo-	Diencephalon	Species-specific	Yes
HSA_CIRCpedia_102727	Human (hg38)	HTT	ENST00000355072.9	Chr4:3125548â€“3131775	+	0.028	11-16	Ribo-	Diencephalon	Species-specific	No
HSA_CIRCpedia_48436	Human (hg38)	HTT	ENST00000355072.9	Chr4:3186596â€“3204148	+	0.028	38-42	Ribo-	Diencephalon	Species-specific	No
HSA_CIRCpedia_102732	Human (hg38)	HTT	ENST00000355072.9	Chr4:3135903â€“3136326	+	0.014	20-21	Ribo-	Diencephalon	Species-specific	No
HSA_CIRCpedia_147397	Human (hg38)	HTT	ENST00000355072.9	Chr4:3140509â€“3172397	+	0.014	22-30	Ribo-	Diencephalon	Species-specific	No
HSA_CIRCpedia_48409	Human (hg38)	HTT	ENST00000355072.9	Chr4:3105356â€“3107423	+	0.014	5-6	Ribo-	Diencephalon	Species-specific	No
HSA_CIRCpedia_48438	Human (hg38)	HTT	ENST00000355072.9	Chr4:3199731â€“3204148	+	0.014	41-42	Ribo-	Diencephalon	Species-specific	No
HSA_CIRCpedia_48392	Human (hg38)	HTT	ENST00000355072.9	Chr4:3086938â€“3107423	+	8	2-6	Ribo-	Forebrain	MMU_CIRCpedia_17475	Yes
HSA_CIRCpedia_48423	Human (hg38)	HTT	ENST00000355072.9	Chr4:3154292â€“3157199	+	3	27-28	Ribo-	Forebrain	MMU_CIRCpedia_212182	Yes
HSA_CIRCpedia_48405	Human (hg38)	HTT	ENST00000355072.9	Chr4:3103823â€“3107423	+	3	4-6	Ribo-	Forebrain	Species-specific	No
HSA_CIRCpedia_48389	Human (hg38)	HTT	ENST00000355072.9	Chr4:3086938â€“3099394	+	2	2-3	Ribo-	Forebrain	Species-specific	No
HSA_CIRCpedia_123792	Human (hg38)	HTT	ENST00000355072.9	Chr4:3174720â€“3199939	+	2	32-41	Ribo-	Forebrain	Species-specific	No
HSA_CIRCpedia_356011	Human (hg38)	HTT	ENST00000355072.9	Chr4:3238446â€“3238609	+	1	65-65	Ribo-	Forebrain	Species-specific	No
HSA_CIRCpedia_48400	Human (hg38)	HTT	ENST00000355072.9	Chr4:3086938â€“3160392	+	1	2-29	Ribo-	Forebrain	Species-specific	No
HSA_CIRCpedia_48438	Human (hg38)	HTT	ENST00000355072.9	Chr4:3199731â€“3204148	+	1	41-42	Ribo-	Forebrain	Species-specific	No
HSA_CIRCpedia_48392	Human (hg38)	HTT	ENST00000355072.9	Chr4:3086938â€“3107423	+	0.311	2-6	poly(A)-	GM12878	MMU_CIRCpedia_17475	Yes
HSA_CIRCpedia_48423	Human (hg38)	HTT	ENST00000355072.9	Chr4:3154292â€“3157199	+	0.123	27-28	poly(A)-	GM12878	MMU_CIRCpedia_212182	Yes
HSA_CIRCpedia_48434	Human (hg38)	HTT	ENST00000355072.9	Chr4:3186596â€“3189093	+	0.097	38-40	poly(A)-	GM12878	Species-specific	Yes
HSA_CIRCpedia_48435	Human (hg38)	HTT	ENST00000355072.9	Chr4:3186596â€“3199939	+	0.077	38-41	poly(A)-	GM12878	Species-specific	Yes
HSA_CIRCpedia_48430	Human (hg38)	HTT	ENST00000355072.9	Chr4:3182353â€“3189093	+	0.077	37-40	poly(A)-	GM12878	Species-specific	Yes
HSA_CIRCpedia_48405	Human (hg38)	HTT	ENST00000355072.9	Chr4:3103823â€“3107423	+	0.058	4-6	poly(A)-	GM12878	Species-specific	Yes
HSA_CIRCpedia_48396	Human (hg38)	HTT	ENST00000355072.9	Chr4:3086938â€“3130423	+	0.051	2-14	poly(A)-	GM12878	Species-specific	No
HSA_CIRCpedia_48406	Human (hg38)	HTT	ENST00000355072.9	Chr4:3103823â€“3121432	+	0.012	4-9	poly(A)-	GM12878	Species-specific	No
HSA_CIRCpedia_48393	Human (hg38)	HTT	ENST00000355072.9	Chr4:3086938â€“3116263	+	0.012	2-8	poly(A)-	GM12878	Species-specific	No
HSA_CIRCpedia_48399	Human (hg38)	HTT	ENST00000355072.9	Chr4:3086938â€“3154419	+	0.012	2-27	poly(A)-	GM12878	Species-specific	No
HSA_CIRCpedia_48413	Human (hg38)	HTT	ENST00000355072.9	Chr4:3122888â€“3148207	+	0.012	10-26	poly(A)-	GM12878	Species-specific	No
HSA_CIRCpedia_346212	Human (hg38)	HTT	ENST00000355072.9	Chr4:3130304â€“3206983	+	0.006	14-44	poly(A)-	GM12878	Species-specific	No
HSA_CIRCpedia_346213	Human (hg38)	HTT	ENST00000355072.9	Chr4:3180514â€“3187886	+	0.006	36-39	poly(A)-	GM12878	Species-specific	No
HSA_CIRCpedia_48422	Human (hg38)	HTT	ENST00000355072.9	Chr4:3148004â€“3154419	+	0.006	26-27	poly(A)-	GM12878	Species-specific	No
HSA_CIRCpedia_48392	Human (hg38)	HTT	ENST00000355072.9	Chr4:3086938â€“3107423	+	0.349	2-6	poly(A)-	H1	MMU_CIRCpedia_17475	Yes
HSA_CIRCpedia_48430	Human (hg38)	HTT	ENST00000355072.9	Chr4:3182353â€“3189093	+	0.046	37-40	poly(A)-	H1	Species-specific	No
HSA_CIRCpedia_48389	Human (hg38)	HTT	ENST00000355072.9	Chr4:3086938â€“3099394	+	0.039	2-3	poly(A)-	H1	Species-specific	No
HSA_CIRCpedia_48393	Human (hg38)	HTT	ENST00000355072.9	Chr4:3086938â€“3116263	+	0.032	2-8	poly(A)-	H1	Species-specific	Yes
HSA_CIRCpedia_347102	Human (hg38)	HTT	ENST00000355072.9	Chr4:3116084â€“3116263	+	0.019	8-8	poly(A)-	H1	Species-specific	No
HSA_CIRCpedia_347103	Human (hg38)	HTT	ENST00000355072.9	Chr4:3225660â€“3233353	+	0.013	57-61	poly(A)-	H1	Species-specific	No
HSA_CIRCpedia_48391	Human (hg38)	HTT	ENST00000355072.9	Chr4:3086938â€“3105436	+	0.013	2-5	poly(A)-	H1	MMU_CIRCpedia_17474	No
HSA_CIRCpedia_48392	Human (hg38)	HTT	ENST00000355072.9	Chr4:3086938â€“3107423	+	1.158	2-6	RNase R	H9	MMU_CIRCpedia_17475	Yes
HSA_CIRCpedia_48389	Human (hg38)	HTT	ENST00000355072.9	Chr4:3086938â€“3099394	+	0.159	2-3	RNase R	H9	Species-specific	No
HSA_CIRCpedia_48393	Human (hg38)	HTT	ENST00000355072.9	Chr4:3086938â€“3116263	+	0.159	2-8	RNase R	H9	Species-specific	No
HSA_CIRCpedia_48434	Human (hg38)	HTT	ENST00000355072.9	Chr4:3186596â€“3189093	+	0.119	38-40	RNase R	H9	Species-specific	Yes
HSA_CIRCpedia_48390	Human (hg38)	HTT	ENST00000355072.9	Chr4:3086938â€“3103883	+	0.079	2-4	RNase R	H9	Species-specific	No
HSA_CIRCpedia_48392	Human (hg38)	HTT	ENST00000355072.9	Chr4:3086938â€“3107423	+	0.079	2-6	Ribo-	H9	MMU_CIRCpedia_17475	Yes
HSA_CIRCpedia_48392	Human (hg38)	HTT	ENST00000355072.9	Chr4:3086938â€“3107423	+	0.05	2-6	poly(A)-	H9	MMU_CIRCpedia_17475	No
HSA_CIRCpedia_48391	Human (hg38)	HTT	ENST00000355072.9	Chr4:3086938â€“3105436	+	0.039	2-5	RNase R	H9	MMU_CIRCpedia_17474	No
HSA_CIRCpedia_48407	Human (hg38)	HTT	ENST00000355072.9	Chr4:3103823â€“3125629	+	0.039	4-11	RNase R	H9	Species-specific	No
HSA_CIRCpedia_48390	Human (hg38)	HTT	ENST00000355072.9	Chr4:3086938â€“3103883	+	0.013	2-4	Ribo-	H9	Species-specific	No
HSA_CIRCpedia_48389	Human (hg38)	HTT	ENST00000355072.9	Chr4:3086938â€“3099394	+	0.013	2-3	Ribo-	H9	Species-specific	No
HSA_CIRCpedia_48402	Human (hg38)	HTT	ENST00000355072.9	Chr4:3086938â€“3189093	+	0.013	2-40	Ribo-	H9	Species-specific	No
HSA_CIRCpedia_48392	Human (hg38)	HTT	ENST00000355072.9	Chr4:3086938â€“3107423	+	0.482	2-6	Ribo-	Heart	MMU_CIRCpedia_17475	Yes
HSA_CIRCpedia_48423	Human (hg38)	HTT	ENST00000355072.9	Chr4:3154292â€“3157199	+	0.032	27-28	Ribo-	Heart	MMU_CIRCpedia_212182	No
HSA_CIRCpedia_48434	Human (hg38)	HTT	ENST00000355072.9	Chr4:3186596â€“3189093	+	0.016	38-40	Ribo-	Heart	Species-specific	No
HSA_CIRCpedia_48434	Human (hg38)	HTT	ENST00000355072.9	Chr4:3186596â€“3189093	+	0.101	38-40	poly(A)-	HeLa_S3	Species-specific	Yes
HSA_CIRCpedia_48392	Human (hg38)	HTT	ENST00000355072.9	Chr4:3086938â€“3107423	+	0.028	2-6	poly(A)-	HeLa_S3	MMU_CIRCpedia_17475	No
HSA_CIRCpedia_48426	Human (hg38)	HTT	ENST00000355072.9	Chr4:3172319â€“3189093	+	0.028	30-40	poly(A)-	HeLa_S3	Species-specific	No
HSA_CIRCpedia_48421	Human (hg38)	HTT	ENST00000355072.9	Chr4:3145151â€“3175107	+	0.021	24-33	poly(A)-	HeLa_S3	Species-specific	No
HSA_CIRCpedia_48400	Human (hg38)	HTT	ENST00000355072.9	Chr4:3086938â€“3160392	+	0.021	2-29	poly(A)-	HeLa_S3	Species-specific	No
HSA_CIRCpedia_48416	Human (hg38)	HTT	ENST00000355072.9	Chr4:3132561â€“3148207	+	0.007	17-26	poly(A)-	HeLa_S3	Species-specific	No
HSA_CIRCpedia_48435	Human (hg38)	HTT	ENST00000355072.9	Chr4:3186596â€“3199939	+	0.057	38-41	poly(A)-	HepG2	Species-specific	No
HSA_CIRCpedia_48434	Human (hg38)	HTT	ENST00000355072.9	Chr4:3186596â€“3189093	+	0.038	38-40	poly(A)-	HepG2	Species-specific	No
HSA_CIRCpedia_48444	Human (hg38)	HTT	ENST00000355072.9	Chr4:3235283â€“3238609	+	0.019	6'2-65	poly(A)-	HepG2	Species-specific	No
HSA_CIRCpedia_48392	Human (hg38)	HTT	ENST00000355072.9	Chr4:3086938â€“3107423	+	0.012	2-6	poly(A)-	HepG2	MMU_CIRCpedia_17475	No
HSA_CIRCpedia_48415	Human (hg38)	HTT	ENST00000355072.9	Chr4:3130304â€“3174799	+	0.012	14-32	poly(A)-	HepG2	Species-specific	No
HSA_CIRCpedia_48392	Human (hg38)	HTT	ENST00000355072.9	Chr4:3086938â€“3107423	+	1.947	2-6	RNase R	Hs68	MMU_CIRCpedia_17475	Yes
HSA_CIRCpedia_48434	Human (hg38)	HTT	ENST00000355072.9	Chr4:3186596â€“3189093	+	0.234	38-40	RNase R	Hs68	Species-specific	Yes
HSA_CIRCpedia_48389	Human (hg38)	HTT	ENST00000355072.9	Chr4:3086938â€“3099394	+	0.12	2-3	RNase R	Hs68	Species-specific	Yes
HSA_CIRCpedia_48392	Human (hg38)	HTT	ENST00000355072.9	Chr4:3086938â€“3107423	+	0.085	2-6	Ribo-	Hs68	MMU_CIRCpedia_17475	Yes
HSA_CIRCpedia_48393	Human (hg38)	HTT	ENST00000355072.9	Chr4:3086938â€“3116263	+	0.081	2-8	RNase R	Hs68	Species-specific	Yes
HSA_CIRCpedia_48435	Human (hg38)	HTT	ENST00000355072.9	Chr4:3186596â€“3199939	+	0.074	38-41	RNase R	Hs68	Species-specific	Yes
HSA_CIRCpedia_48405	Human (hg38)	HTT	ENST00000355072.9	Chr4:3103823â€“3107423	+	0.045	4-6	RNase R	Hs68	Species-specific	Yes
HSA_CIRCpedia_48423	Human (hg38)	HTT	ENST00000355072.9	Chr4:3154292â€“3157199	+	0.042	27-28	RNase R	Hs68	MMU_CIRCpedia_212182	Yes
HSA_CIRCpedia_48404	Human (hg38)	HTT	ENST00000355072.9	Chr4:3099273â€“3107423	+	0.039	3-6	RNase R	Hs68	MMU_CIRCpedia_223381	Yes
HSA_CIRCpedia_102732	Human (hg38)	HTT	ENST00000355072.9	Chr4:3135903â€“3136326	+	0.022	20-21	RNase R	Hs68	Species-specific	Yes
HSA_CIRCpedia_48438	Human (hg38)	HTT	ENST00000355072.9	Chr4:3199731â€“3204148	+	0.019	41-42	RNase R	Hs68	Species-specific	Yes
HSA_CIRCpedia_48430	Human (hg38)	HTT	ENST00000355072.9	Chr4:3182353â€“3189093	+	0.016	37-40	RNase R	Hs68	Species-specific	Yes
HSA_CIRCpedia_102734	Human (hg38)	HTT	ENST00000355072.9	Chr4:3154292â€“3160392	+	0.013	27-29	RNase R	Hs68	MMU_CIRCpedia_226010	Yes
HSA_CIRCpedia_48431	Human (hg38)	HTT	ENST00000355072.9	Chr4:3182353â€“3199939	+	0.009	37-41	RNase R	Hs68	Species-specific	Yes
HSA_CIRCpedia_48427	Human (hg38)	HTT	ENST00000355072.9	Chr4:3174720â€“3189093	+	0.009	32-40	RNase R	Hs68	Species-specific	No
HSA_CIRCpedia_48429	Human (hg38)	HTT	ENST00000355072.9	Chr4:3180514â€“3189093	+	0.009	36-40	RNase R	Hs68	MMU_CIRCpedia_17522	No
HSA_CIRCpedia_48393	Human (hg38)	HTT	ENST00000355072.9	Chr4:3086938â€“3116263	+	0.008	2-8	Ribo-	Hs68	Species-specific	No
HSA_CIRCpedia_102731	Human (hg38)	HTT	ENST00000355072.9	Chr4:3134400â€“3136326	+	0.006	19-21	RNase R	Hs68	Species-specific	No
HSA_CIRCpedia_102733	Human (hg38)	HTT	ENST00000355072.9	Chr4:3146796â€“3160392	+	0.006	25-29	RNase R	Hs68	Species-specific	No
HSA_CIRCpedia_48394	Human (hg38)	HTT	ENST00000355072.9	Chr4:3086938â€“3121432	+	0.006	2-9	RNase R	Hs68	Species-specific	No
HSA_CIRCpedia_48391	Human (hg38)	HTT	ENST00000355072.9	Chr4:3086938â€“3105436	+	0.006	2-5	RNase R	Hs68	MMU_CIRCpedia_17474	No
HSA_CIRCpedia_48436	Human (hg38)	HTT	ENST00000355072.9	Chr4:3186596â€“3204148	+	0.006	38-42	RNase R	Hs68	Species-specific	No
HSA_CIRCpedia_102730	Human (hg38)	HTT	ENST00000355072.9	Chr4:3130304â€“3140656	+	0.006	14-22	RNase R	Hs68	Species-specific	No
HSA_CIRCpedia_48406	Human (hg38)	HTT	ENST00000355072.9	Chr4:3103823â€“3121432	+	0.006	4-9	RNase R	Hs68	Species-specific	No
HSA_CIRCpedia_48417	Human (hg38)	HTT	ENST00000355072.9	Chr4:3134400â€“3134540	+	0.004	19-19	Ribo-	Hs68	Species-specific	No
HSA_CIRCpedia_48389	Human (hg38)	HTT	ENST00000355072.9	Chr4:3086938â€“3099394	+	0.004	2-3	Ribo-	Hs68	Species-specific	No
HSA_CIRCpedia_48400	Human (hg38)	HTT	ENST00000355072.9	Chr4:3086938â€“3160392	+	0.004	2-29	Ribo-	Hs68	Species-specific	No
HSA_CIRCpedia_102739	Human (hg38)	HTT	ENST00000355072.9	Chr4:3228614â€“3233353	+	0.003	58-61	RNase R	Hs68	Species-specific	No
HSA_CIRCpedia_48398	Human (hg38)	HTT	ENST00000355072.9	Chr4:3086938â€“3136326	+	0.003	2-21	RNase R	Hs68	Species-specific	No
HSA_CIRCpedia_102723	Human (hg38)	HTT	ENST00000355072.9	Chr4:3115303â€“3136326	+	0.003	7-21	RNase R	Hs68	Species-specific	No
HSA_CIRCpedia_102722	Human (hg38)	HTT	ENST00000355072.9	Chr4:3103823â€“3116263	+	0.003	4-8	RNase R	Hs68	MMU_CIRCpedia_214889	No
HSA_CIRCpedia_102727	Human (hg38)	HTT	ENST00000355072.9	Chr4:3125548â€“3131775	+	0.003	11-16	RNase R	Hs68	Species-specific	No
HSA_CIRCpedia_102726	Human (hg38)	HTT	ENST00000355072.9	Chr4:3125548â€“3136326	+	0.003	11-21	RNase R	Hs68	Species-specific	No
HSA_CIRCpedia_102728	Human (hg38)	HTT	ENST00000355072.9	Chr4:3127263â€“3140656	+	0.003	12-22	RNase R	Hs68	Species-specific	No
HSA_CIRCpedia_102721	Human (hg38)	HTT	ENST00000355072.9	Chr4:3086938â€“3127604	+	0.003	2-12	RNase R	Hs68	Species-specific	No
HSA_CIRCpedia_102724	Human (hg38)	HTT	ENST00000355072.9	Chr4:3122888â€“3136326	+	0.003	10-21	RNase R	Hs68	Species-specific	No
HSA_CIRCpedia_102725	Human (hg38)	HTT	ENST00000355072.9	Chr4:3122888â€“3131397	+	0.003	10-15	RNase R	Hs68	Species-specific	No
HSA_CIRCpedia_102729	Human (hg38)	HTT	ENST00000355072.9	Chr4:3130304â€“3148207	+	0.003	14-26	RNase R	Hs68	Species-specific	No
HSA_CIRCpedia_48411	Human (hg38)	HTT	ENST00000355072.9	Chr4:3121227â€“3125629	+	0.003	9-11	RNase R	Hs68	Species-specific	No
HSA_CIRCpedia_102735	Human (hg38)	HTT	ENST00000355072.9	Chr4:3174720â€“3182470	+	0.003	32-37	RNase R	Hs68	Species-specific	No
HSA_CIRCpedia_102736	Human (hg38)	HTT	ENST00000355072.9	Chr4:3174945â€“3189093	+	0.003	33-40	RNase R	Hs68	Species-specific	No
HSA_CIRCpedia_48443	Human (hg38)	HTT	ENST00000355072.9	Chr4:3235283â€“3236254	+	0.059	6'2-64	poly(A)-	HUVEC	Species-specific	No
HSA_CIRCpedia_48392	Human (hg38)	HTT	ENST00000355072.9	Chr4:3086938â€“3107423	+	0.335	2-6	poly(A)-	K562	MMU_CIRCpedia_17475	Yes
HSA_CIRCpedia_48400	Human (hg38)	HTT	ENST00000355072.9	Chr4:3086938â€“3160392	+	0.062	2-29	poly(A)-	K562	Species-specific	Yes
HSA_CIRCpedia_48405	Human (hg38)	HTT	ENST00000355072.9	Chr4:3103823â€“3107423	+	0.043	4-6	poly(A)-	K562	Species-specific	Yes
HSA_CIRCpedia_48414	Human (hg38)	HTT	ENST00000355072.9	Chr4:3130304â€“3131775	+	0.037	14-16	poly(A)-	K562	Species-specific	No
HSA_CIRCpedia_48393	Human (hg38)	HTT	ENST00000355072.9	Chr4:3086938â€“3116263	+	0.037	2-8	poly(A)-	K562	Species-specific	No
HSA_CIRCpedia_48398	Human (hg38)	HTT	ENST00000355072.9	Chr4:3086938â€“3136326	+	0.031	2-21	poly(A)-	K562	Species-specific	Yes
HSA_CIRCpedia_48434	Human (hg38)	HTT	ENST00000355072.9	Chr4:3186596â€“3189093	+	0.024	38-40	poly(A)-	K562	Species-specific	Yes
HSA_CIRCpedia_48389	Human (hg38)	HTT	ENST00000355072.9	Chr4:3086938â€“3099394	+	0.024	2-3	poly(A)-	K562	Species-specific	No
HSA_CIRCpedia_351687	Human (hg38)	HTT	ENST00000355072.9	Chr4:3086938â€“3122936	+	0.018	2-10	poly(A)-	K562	Species-specific	No
HSA_CIRCpedia_48406	Human (hg38)	HTT	ENST00000355072.9	Chr4:3103823â€“3121432	+	0.018	4-9	poly(A)-	K562	Species-specific	No
HSA_CIRCpedia_48423	Human (hg38)	HTT	ENST00000355072.9	Chr4:3154292â€“3157199	+	0.012	27-28	poly(A)-	K562	MMU_CIRCpedia_212182	No
HSA_CIRCpedia_48436	Human (hg38)	HTT	ENST00000355072.9	Chr4:3186596â€“3204148	+	0.006	38-42	poly(A)-	K562	Species-specific	No
HSA_CIRCpedia_48433	Human (hg38)	HTT	ENST00000355072.9	Chr4:3186596â€“3186719	+	0.006	38-38	poly(A)-	K562	Species-specific	No
HSA_CIRCpedia_351689	Human (hg38)	HTT	ENST00000355072.9	Chr4:3136225â€“3142886	+	0.006	21-23	poly(A)-	K562	Species-specific	No
HSA_CIRCpedia_117720	Human (hg38)	HTT	ENST00000355072.9	Chr4:3129923â€“3189093	+	0.006	13-40	poly(A)-	K562	Species-specific	No
HSA_CIRCpedia_48442	Human (hg38)	HTT	ENST00000355072.9	Chr4:3213957â€“3230042	+	0.006	50-60	poly(A)-	K562	Species-specific	No
HSA_CIRCpedia_351688	Human (hg38)	HTT	ENST00000355072.9	Chr4:3086938â€“3131397	+	0.006	2-15	poly(A)-	K562	Species-specific	No
HSA_CIRCpedia_48417	Human (hg38)	HTT	ENST00000355072.9	Chr4:3134400â€“3134540	+	0.006	19-19	poly(A)-	K562	Species-specific	No
HSA_CIRCpedia_48424	Human (hg38)	HTT	ENST00000355072.9	Chr4:3154292â€“3206983	+	0.006	27-44	poly(A)-	K562	Species-specific	No
HSA_CIRCpedia_48434	Human (hg38)	HTT	ENST00000355072.9	Chr4:3186596â€“3189093	+	0.19	38-40	Ribo-	Kidney	Species-specific	No
HSA_CIRCpedia_48393	Human (hg38)	HTT	ENST00000355072.9	Chr4:3086938â€“3116263	+	0.01	2-8	Ribo-	Kidney	Species-specific	No
HSA_CIRCpedia_48392	Human (hg38)	HTT	ENST00000355072.9	Chr4:3086938â€“3107423	+	0.23	2-6	Ribo-	Liver	MMU_CIRCpedia_17475	Yes
HSA_CIRCpedia_48430	Human (hg38)	HTT	ENST00000355072.9	Chr4:3182353â€“3189093	+	0.027	37-40	Ribo-	Liver	Species-specific	No
HSA_CIRCpedia_48434	Human (hg38)	HTT	ENST00000355072.9	Chr4:3186596â€“3189093	+	0.02	38-40	Ribo-	Liver	Species-specific	No
HSA_CIRCpedia_48393	Human (hg38)	HTT	ENST00000355072.9	Chr4:3086938â€“3116263	+	0.013	2-8	Ribo-	Liver	Species-specific	No
HSA_CIRCpedia_48423	Human (hg38)	HTT	ENST00000355072.9	Chr4:3154292â€“3157199	+	0.006	27-28	Ribo-	Liver	MMU_CIRCpedia_212182	No
HSA_CIRCpedia_48435	Human (hg38)	HTT	ENST00000355072.9	Chr4:3186596â€“3199939	+	0.006	38-41	Ribo-	Liver	Species-specific	No
HSA_CIRCpedia_153684	Human (hg38)	HTT	ENST00000355072.9	Chr4:3103823â€“3105436	+	0.006	4-5	Ribo-	Liver	Species-specific	No
HSA_CIRCpedia_102728	Human (hg38)	HTT	ENST00000355072.9	Chr4:3127263â€“3140656	+	0.006	12-22	Ribo-	Liver	Species-specific	No
HSA_CIRCpedia_48392	Human (hg38)	HTT	ENST00000355072.9	Chr4:3086938â€“3107423	+	0.172	2-6	Ribo-	Liver_N10	MMU_CIRCpedia_17475	Yes
HSA_CIRCpedia_370076	Human (hg38)	HTT	ENST00000355072.9	Chr4:3131285â€“3136326	+	0.015	15-21	Ribo-	Liver_N10	Species-specific	No
HSA_CIRCpedia_48392	Human (hg38)	HTT	ENST00000355072.9	Chr4:3086938â€“3107423	+	0.268	2-6	Ribo-	Liver_N11	MMU_CIRCpedia_17475	Yes
HSA_CIRCpedia_48405	Human (hg38)	HTT	ENST00000355072.9	Chr4:3103823â€“3107423	+	0.025	4-6	Ribo-	Liver_N11	Species-specific	No
HSA_CIRCpedia_48434	Human (hg38)	HTT	ENST00000355072.9	Chr4:3186596â€“3189093	+	0.025	38-40	Ribo-	Liver_N11	Species-specific	Yes
HSA_CIRCpedia_48430	Human (hg38)	HTT	ENST00000355072.9	Chr4:3182353â€“3189093	+	0.008	37-40	Ribo-	Liver_N11	Species-specific	No
HSA_CIRCpedia_48392	Human (hg38)	HTT	ENST00000355072.9	Chr4:3086938â€“3107423	+	0.343	2-6	Ribo-	Liver_N12	MMU_CIRCpedia_17475	Yes
HSA_CIRCpedia_48434	Human (hg38)	HTT	ENST00000355072.9	Chr4:3186596â€“3189093	+	0.022	38-40	Ribo-	Liver_N12	Species-specific	No
HSA_CIRCpedia_48392	Human (hg38)	HTT	ENST00000355072.9	Chr4:3086938â€“3107423	+	0.319	2-6	Ribo-	Liver_N13	MMU_CIRCpedia_17475	Yes
HSA_CIRCpedia_48423	Human (hg38)	HTT	ENST00000355072.9	Chr4:3154292â€“3157199	+	0.045	27-28	Ribo-	Liver_N13	MMU_CIRCpedia_212182	Yes
HSA_CIRCpedia_48434	Human (hg38)	HTT	ENST00000355072.9	Chr4:3186596â€“3189093	+	0.011	38-40	Ribo-	Liver_N13	Species-specific	No
HSA_CIRCpedia_102739	Human (hg38)	HTT	ENST00000355072.9	Chr4:3228614â€“3233353	+	0.011	58-61	Ribo-	Liver_N13	Species-specific	No
HSA_CIRCpedia_372909	Human (hg38)	HTT	ENST00000355072.9	Chr4:3140509â€“3148207	+	0.011	22-26	Ribo-	Liver_N13	Species-specific	No
HSA_CIRCpedia_48392	Human (hg38)	HTT	ENST00000355072.9	Chr4:3086938â€“3107423	+	0.536	2-6	Ribo-	Liver_N14	MMU_CIRCpedia_17475	Yes
HSA_CIRCpedia_48405	Human (hg38)	HTT	ENST00000355072.9	Chr4:3103823â€“3107423	+	0.069	4-6	Ribo-	Liver_N14	Species-specific	Yes
HSA_CIRCpedia_48423	Human (hg38)	HTT	ENST00000355072.9	Chr4:3154292â€“3157199	+	0.034	27-28	Ribo-	Liver_N14	MMU_CIRCpedia_212182	No
HSA_CIRCpedia_48389	Human (hg38)	HTT	ENST00000355072.9	Chr4:3086938â€“3099394	+	0.017	2-3	Ribo-	Liver_N14	Species-specific	No
HSA_CIRCpedia_48404	Human (hg38)	HTT	ENST00000355072.9	Chr4:3099273â€“3107423	+	0.017	3-6	Ribo-	Liver_N14	MMU_CIRCpedia_223381	No
HSA_CIRCpedia_48392	Human (hg38)	HTT	ENST00000355072.9	Chr4:3086938â€“3107423	+	0.318	2-6	Ribo-	Liver_N15	MMU_CIRCpedia_17475	Yes
HSA_CIRCpedia_48430	Human (hg38)	HTT	ENST00000355072.9	Chr4:3182353â€“3189093	+	0.026	37-40	Ribo-	Liver_N15	Species-specific	No
HSA_CIRCpedia_373837	Human (hg38)	HTT	ENST00000355072.9	Chr4:3129923â€“3136326	+	0.013	13-21	Ribo-	Liver_N15	Species-specific	No
HSA_CIRCpedia_48392	Human (hg38)	HTT	ENST00000355072.9	Chr4:3086938â€“3107423	+	0.392	2-6	Ribo-	Liver_N17	MMU_CIRCpedia_17475	Yes
HSA_CIRCpedia_102732	Human (hg38)	HTT	ENST00000355072.9	Chr4:3135903â€“3136326	+	0.016	20-21	Ribo-	Liver_N17	Species-specific	No
HSA_CIRCpedia_48430	Human (hg38)	HTT	ENST00000355072.9	Chr4:3182353â€“3189093	+	0.016	37-40	Ribo-	Liver_N17	Species-specific	No
HSA_CIRCpedia_48389	Human (hg38)	HTT	ENST00000355072.9	Chr4:3086938â€“3099394	+	0.016	2-3	Ribo-	Liver_N17	Species-specific	No
HSA_CIRCpedia_158859	Human (hg38)	HTT	ENST00000355072.9	Chr4:3130304â€“3136326	+	0.008	14-21	Ribo-	Liver_N17	Species-specific	No
HSA_CIRCpedia_48423	Human (hg38)	HTT	ENST00000355072.9	Chr4:3154292â€“3157199	+	0.008	27-28	Ribo-	Liver_N17	MMU_CIRCpedia_212182	No
HSA_CIRCpedia_179584	Human (hg38)	HTT	ENST00000355072.9	Chr4:3215109â€“3217952	+	0.008	51-52	Ribo-	Liver_N17	Species-specific	No
HSA_CIRCpedia_48392	Human (hg38)	HTT	ENST00000355072.9	Chr4:3086938â€“3107423	+	0.18	2-6	Ribo-	Liver_N18	MMU_CIRCpedia_17475	Yes
HSA_CIRCpedia_102734	Human (hg38)	HTT	ENST00000355072.9	Chr4:3154292â€“3160392	+	0.013	27-29	Ribo-	Liver_N18	MMU_CIRCpedia_226010	No
HSA_CIRCpedia_48392	Human (hg38)	HTT	ENST00000355072.9	Chr4:3086938â€“3107423	+	0.259	2-6	Ribo-	Liver_N19	MMU_CIRCpedia_17475	Yes
HSA_CIRCpedia_48434	Human (hg38)	HTT	ENST00000355072.9	Chr4:3186596â€“3189093	+	0.014	38-40	Ribo-	Liver_N19	Species-specific	No
HSA_CIRCpedia_48430	Human (hg38)	HTT	ENST00000355072.9	Chr4:3182353â€“3189093	+	0.014	37-40	Ribo-	Liver_N19	Species-specific	No
HSA_CIRCpedia_48392	Human (hg38)	HTT	ENST00000355072.9	Chr4:3086938â€“3107423	+	0.24	2-6	Ribo-	Liver_N20	MMU_CIRCpedia_17475	Yes
HSA_CIRCpedia_48389	Human (hg38)	HTT	ENST00000355072.9	Chr4:3086938â€“3099394	+	0.014	2-3	Ribo-	Liver_N20	Species-specific	No
HSA_CIRCpedia_48430	Human (hg38)	HTT	ENST00000355072.9	Chr4:3182353â€“3189093	+	0.014	37-40	Ribo-	Liver_N20	Species-specific	No
HSA_CIRCpedia_48392	Human (hg38)	HTT	ENST00000355072.9	Chr4:3086938â€“3107423	+	0.287	2-6	Ribo-	Liver_N21	MMU_CIRCpedia_17475	Yes
HSA_CIRCpedia_48434	Human (hg38)	HTT	ENST00000355072.9	Chr4:3186596â€“3189093	+	0.057	38-40	Ribo-	Liver_N21	Species-specific	Yes
HSA_CIRCpedia_48405	Human (hg38)	HTT	ENST00000355072.9	Chr4:3103823â€“3107423	+	0.028	4-6	Ribo-	Liver_N21	Species-specific	No
HSA_CIRCpedia_48435	Human (hg38)	HTT	ENST00000355072.9	Chr4:3186596â€“3199939	+	0.014	38-41	Ribo-	Liver_N21	Species-specific	No
HSA_CIRCpedia_48392	Human (hg38)	HTT	ENST00000355072.9	Chr4:3086938â€“3107423	+	0.189	2-6	Ribo-	Liver_N22	MMU_CIRCpedia_17475	Yes
HSA_CIRCpedia_48392	Human (hg38)	HTT	ENST00000355072.9	Chr4:3086938â€“3107423	+	0.193	2-6	Ribo-	Liver_N3	MMU_CIRCpedia_17475	Yes
HSA_CIRCpedia_48423	Human (hg38)	HTT	ENST00000355072.9	Chr4:3154292â€“3157199	+	0.032	27-28	Ribo-	Liver_N3	MMU_CIRCpedia_212182	No
HSA_CIRCpedia_374895	Human (hg38)	HTT	ENST00000355072.9	Chr4:3122888â€“3154419	+	0.016	10-27	Ribo-	Liver_N3	Species-specific	No
HSA_CIRCpedia_48434	Human (hg38)	HTT	ENST00000355072.9	Chr4:3186596â€“3189093	+	0.016	38-40	Ribo-	Liver_N3	Species-specific	No
HSA_CIRCpedia_48392	Human (hg38)	HTT	ENST00000355072.9	Chr4:3086938â€“3107423	+	0.195	2-6	Ribo-	Liver_N6	MMU_CIRCpedia_17475	Yes
HSA_CIRCpedia_48393	Human (hg38)	HTT	ENST00000355072.9	Chr4:3086938â€“3116263	+	0.013	2-8	Ribo-	Liver_N6	Species-specific	No
HSA_CIRCpedia_48392	Human (hg38)	HTT	ENST00000355072.9	Chr4:3086938â€“3107423	+	0.144	2-6	Ribo-	Liver_N7	MMU_CIRCpedia_17475	Yes
HSA_CIRCpedia_48405	Human (hg38)	HTT	ENST00000355072.9	Chr4:3103823â€“3107423	+	0.032	4-6	Ribo-	Liver_N7	Species-specific	No
HSA_CIRCpedia_48434	Human (hg38)	HTT	ENST00000355072.9	Chr4:3186596â€“3189093	+	0.016	38-40	Ribo-	Liver_N7	Species-specific	No
HSA_CIRCpedia_48404	Human (hg38)	HTT	ENST00000355072.9	Chr4:3099273â€“3107423	+	0.016	3-6	Ribo-	Liver_N7	MMU_CIRCpedia_223381	No
HSA_CIRCpedia_48392	Human (hg38)	HTT	ENST00000355072.9	Chr4:3086938â€“3107423	+	0.084	2-6	Ribo-	Liver_N8	MMU_CIRCpedia_17475	Yes
HSA_CIRCpedia_48404	Human (hg38)	HTT	ENST00000355072.9	Chr4:3099273â€“3107423	+	0.016	3-6	Ribo-	Liver_N8	MMU_CIRCpedia_223381	No
HSA_CIRCpedia_48434	Human (hg38)	HTT	ENST00000355072.9	Chr4:3186596â€“3189093	+	0.016	38-40	Ribo-	Liver_N8	Species-specific	No
HSA_CIRCpedia_48392	Human (hg38)	HTT	ENST00000355072.9	Chr4:3086938â€“3107423	+	0.373	2-6	Ribo-	Liver_T10	MMU_CIRCpedia_17475	Yes
HSA_CIRCpedia_48389	Human (hg38)	HTT	ENST00000355072.9	Chr4:3086938â€“3099394	+	0.026	2-3	Ribo-	Liver_T10	Species-specific	No
HSA_CIRCpedia_48393	Human (hg38)	HTT	ENST00000355072.9	Chr4:3086938â€“3116263	+	0.013	2-8	Ribo-	Liver_T10	Species-specific	No
HSA_CIRCpedia_48401	Human (hg38)	HTT	ENST00000355072.9	Chr4:3086938â€“3172397	+	0.013	2-30	Ribo-	Liver_T10	Species-specific	No
HSA_CIRCpedia_48434	Human (hg38)	HTT	ENST00000355072.9	Chr4:3186596â€“3189093	+	0.013	38-40	Ribo-	Liver_T10	Species-specific	No
HSA_CIRCpedia_48423	Human (hg38)	HTT	ENST00000355072.9	Chr4:3154292â€“3157199	+	0.013	27-28	Ribo-	Liver_T10	MMU_CIRCpedia_212182	No
HSA_CIRCpedia_360682	Human (hg38)	HTT	ENST00000355072.9	Chr4:3206806â€“3215211	+	0.013	44-51	Ribo-	Liver_T10	Species-specific	No
HSA_CIRCpedia_48392	Human (hg38)	HTT	ENST00000355072.9	Chr4:3086938â€“3107423	+	0.485	2-6	Ribo-	Liver_T11	MMU_CIRCpedia_17475	Yes
HSA_CIRCpedia_48434	Human (hg38)	HTT	ENST00000355072.9	Chr4:3186596â€“3189093	+	0.021	38-40	Ribo-	Liver_T11	Species-specific	No
HSA_CIRCpedia_48394	Human (hg38)	HTT	ENST00000355072.9	Chr4:3086938â€“3121432	+	0.021	2-9	Ribo-	Liver_T11	Species-specific	No
HSA_CIRCpedia_48423	Human (hg38)	HTT	ENST00000355072.9	Chr4:3154292â€“3157199	+	0.021	27-28	Ribo-	Liver_T11	MMU_CIRCpedia_212182	No
HSA_CIRCpedia_48392	Human (hg38)	HTT	ENST00000355072.9	Chr4:3086938â€“3107423	+	0.403	2-6	Ribo-	Liver_T12	MMU_CIRCpedia_17475	Yes
HSA_CIRCpedia_48434	Human (hg38)	HTT	ENST00000355072.9	Chr4:3186596â€“3189093	+	0.019	38-40	Ribo-	Liver_T12	Species-specific	No
HSA_CIRCpedia_48406	Human (hg38)	HTT	ENST00000355072.9	Chr4:3103823â€“3121432	+	0.009	4-9	Ribo-	Liver_T12	Species-specific	No
HSA_CIRCpedia_48396	Human (hg38)	HTT	ENST00000355072.9	Chr4:3086938â€“3130423	+	0.009	2-14	Ribo-	Liver_T12	Species-specific	No
HSA_CIRCpedia_48398	Human (hg38)	HTT	ENST00000355072.9	Chr4:3086938â€“3136326	+	0.009	2-21	Ribo-	Liver_T12	Species-specific	No
HSA_CIRCpedia_48404	Human (hg38)	HTT	ENST00000355072.9	Chr4:3099273â€“3107423	+	0.009	3-6	Ribo-	Liver_T12	MMU_CIRCpedia_223381	No
HSA_CIRCpedia_48392	Human (hg38)	HTT	ENST00000355072.9	Chr4:3086938â€“3107423	+	0.193	2-6	Ribo-	Liver_T13	MMU_CIRCpedia_17475	Yes
HSA_CIRCpedia_48412	Human (hg38)	HTT	ENST00000355072.9	Chr4:3122888â€“3125629	+	0.032	10-11	Ribo-	Liver_T13	Species-specific	No
HSA_CIRCpedia_48444	Human (hg38)	HTT	ENST00000355072.9	Chr4:3235283â€“3238609	+	0.016	62-65	Ribo-	Liver_T13	Species-specific	No
HSA_CIRCpedia_48434	Human (hg38)	HTT	ENST00000355072.9	Chr4:3186596â€“3189093	+	0.016	38-40	Ribo-	Liver_T13	Species-specific	No
HSA_CIRCpedia_48405	Human (hg38)	HTT	ENST00000355072.9	Chr4:3103823â€“3107423	+	0.016	4-6	Ribo-	Liver_T13	Species-specific	No
HSA_CIRCpedia_363841	Human (hg38)	HTT	ENST00000355072.9	Chr4:3225660â€“3238609	+	0.016	57-65	Ribo-	Liver_T13	Species-specific	No
HSA_CIRCpedia_48436	Human (hg38)	HTT	ENST00000355072.9	Chr4:3186596â€“3204148	+	0.016	38-42	Ribo-	Liver_T13	Species-specific	No
HSA_CIRCpedia_48392	Human (hg38)	HTT	ENST00000355072.9	Chr4:3086938â€“3107423	+	1.042	2-6	Ribo-	Liver_T14	MMU_CIRCpedia_17475	Yes
HSA_CIRCpedia_48434	Human (hg38)	HTT	ENST00000355072.9	Chr4:3186596â€“3189093	+	0.217	38-40	Ribo-	Liver_T14	Species-specific	Yes
HSA_CIRCpedia_48404	Human (hg38)	HTT	ENST00000355072.9	Chr4:3099273â€“3107423	+	0.057	3-6	Ribo-	Liver_T14	MMU_CIRCpedia_223381	Yes
HSA_CIRCpedia_48423	Human (hg38)	HTT	ENST00000355072.9	Chr4:3154292â€“3157199	+	0.034	27-28	Ribo-	Liver_T14	MMU_CIRCpedia_212182	No
HSA_CIRCpedia_48405	Human (hg38)	HTT	ENST00000355072.9	Chr4:3103823â€“3107423	+	0.034	4-6	Ribo-	Liver_T14	Species-specific	Yes
HSA_CIRCpedia_48422	Human (hg38)	HTT	ENST00000355072.9	Chr4:3148004â€“3154419	+	0.022	26-27	Ribo-	Liver_T14	Species-specific	No
HSA_CIRCpedia_48412	Human (hg38)	HTT	ENST00000355072.9	Chr4:3122888â€“3125629	+	0.022	10-11	Ribo-	Liver_T14	Species-specific	No
HSA_CIRCpedia_365782	Human (hg38)	HTT	ENST00000355072.9	Chr4:3135903â€“3142886	+	0.022	20-23	Ribo-	Liver_T14	Species-specific	No
HSA_CIRCpedia_48393	Human (hg38)	HTT	ENST00000355072.9	Chr4:3086938â€“3116263	+	0.011	2-8	Ribo-	Liver_T14	Species-specific	No
HSA_CIRCpedia_365783	Human (hg38)	HTT	ENST00000355072.9	Chr4:3142765â€“3154419	+	0.011	23-27	Ribo-	Liver_T14	Species-specific	No
HSA_CIRCpedia_48430	Human (hg38)	HTT	ENST00000355072.9	Chr4:3182353â€“3189093	+	0.011	37-40	Ribo-	Liver_T14	Species-specific	No
HSA_CIRCpedia_48398	Human (hg38)	HTT	ENST00000355072.9	Chr4:3086938â€“3136326	+	0.011	2-21	Ribo-	Liver_T14	Species-specific	No
HSA_CIRCpedia_102731	Human (hg38)	HTT	ENST00000355072.9	Chr4:3134400â€“3136326	+	0.011	19-21	Ribo-	Liver_T14	Species-specific	No
HSA_CIRCpedia_48440	Human (hg38)	HTT	ENST00000355072.9	Chr4:3206495â€“3209949	+	0.011	43-47	Ribo-	Liver_T14	Species-specific	No
HSA_CIRCpedia_48397	Human (hg38)	HTT	ENST00000355072.9	Chr4:3086938â€“3134540	+	0.011	2-19	Ribo-	Liver_T14	Species-specific	No
HSA_CIRCpedia_102726	Human (hg38)	HTT	ENST00000355072.9	Chr4:3125548â€“3136326	+	0.011	11-21	Ribo-	Liver_T14	Species-specific	No
HSA_CIRCpedia_48392	Human (hg38)	HTT	ENST00000355072.9	Chr4:3086938â€“3107423	+	0.183	2-6	Ribo-	Liver_T15	MMU_CIRCpedia_17475	Yes
HSA_CIRCpedia_48412	Human (hg38)	HTT	ENST00000355072.9	Chr4:3122888â€“3125629	+	0.03	10-11	Ribo-	Liver_T15	Species-specific	No
HSA_CIRCpedia_48405	Human (hg38)	HTT	ENST00000355072.9	Chr4:3103823â€“3107423	+	0.03	4-6	Ribo-	Liver_T15	Species-specific	No
HSA_CIRCpedia_48392	Human (hg38)	HTT	ENST00000355072.9	Chr4:3086938â€“3107423	+	0.336	2-6	Ribo-	Liver_T17	MMU_CIRCpedia_17475	Yes
HSA_CIRCpedia_48423	Human (hg38)	HTT	ENST00000355072.9	Chr4:3154292â€“3157199	+	0.048	27-28	Ribo-	Liver_T17	MMU_CIRCpedia_212182	Yes
HSA_CIRCpedia_48405	Human (hg38)	HTT	ENST00000355072.9	Chr4:3103823â€“3107423	+	0.036	4-6	Ribo-	Liver_T17	Species-specific	No
HSA_CIRCpedia_48434	Human (hg38)	HTT	ENST00000355072.9	Chr4:3186596â€“3189093	+	0.036	38-40	Ribo-	Liver_T17	Species-specific	No
HSA_CIRCpedia_48392	Human (hg38)	HTT	ENST00000355072.9	Chr4:3086938â€“3107423	+	0.275	2-6	Ribo-	Liver_T18	MMU_CIRCpedia_17475	Yes
HSA_CIRCpedia_48434	Human (hg38)	HTT	ENST00000355072.9	Chr4:3186596â€“3189093	+	0.034	38-40	Ribo-	Liver_T18	Species-specific	No
HSA_CIRCpedia_48389	Human (hg38)	HTT	ENST00000355072.9	Chr4:3086938â€“3099394	+	0.017	2-3	Ribo-	Liver_T18	Species-specific	No
HSA_CIRCpedia_48400	Human (hg38)	HTT	ENST00000355072.9	Chr4:3086938â€“3160392	+	0.017	2-29	Ribo-	Liver_T18	Species-specific	No
HSA_CIRCpedia_48392	Human (hg38)	HTT	ENST00000355072.9	Chr4:3086938â€“3107423	+	0.063	2-6	Ribo-	Liver_T19	MMU_CIRCpedia_17475	Yes
HSA_CIRCpedia_48412	Human (hg38)	HTT	ENST00000355072.9	Chr4:3122888â€“3125629	+	0.025	10-11	Ribo-	Liver_T19	Species-specific	No
HSA_CIRCpedia_48393	Human (hg38)	HTT	ENST00000355072.9	Chr4:3086938â€“3116263	+	0.012	2-8	Ribo-	Liver_T19	Species-specific	No
HSA_CIRCpedia_179967	Human (hg38)	HTT	ENST00000355072.9	Chr4:3086938â€“3146948	+	0.012	2-25	Ribo-	Liver_T19	Species-specific	No
HSA_CIRCpedia_48392	Human (hg38)	HTT	ENST00000355072.9	Chr4:3086938â€“3107423	+	0.124	2-6	Ribo-	Liver_T20	MMU_CIRCpedia_17475	Yes
HSA_CIRCpedia_48400	Human (hg38)	HTT	ENST00000355072.9	Chr4:3086938â€“3160392	+	0.049	2-29	Ribo-	Liver_T20	Species-specific	Yes
HSA_CIRCpedia_48434	Human (hg38)	HTT	ENST00000355072.9	Chr4:3186596â€“3189093	+	0.012	38-40	Ribo-	Liver_T20	Species-specific	No
HSA_CIRCpedia_48392	Human (hg38)	HTT	ENST00000355072.9	Chr4:3086938â€“3107423	+	0.219	2-6	Ribo-	Liver_T21	MMU_CIRCpedia_17475	Yes
HSA_CIRCpedia_48406	Human (hg38)	HTT	ENST00000355072.9	Chr4:3103823â€“3121432	+	0.014	4-9	Ribo-	Liver_T21	Species-specific	No
HSA_CIRCpedia_102732	Human (hg38)	HTT	ENST00000355072.9	Chr4:3135903â€“3136326	+	0.014	20-21	Ribo-	Liver_T21	Species-specific	No
HSA_CIRCpedia_48434	Human (hg38)	HTT	ENST00000355072.9	Chr4:3186596â€“3189093	+	0.014	38-40	Ribo-	Liver_T21	Species-specific	No
HSA_CIRCpedia_48438	Human (hg38)	HTT	ENST00000355072.9	Chr4:3199731â€“3204148	+	0.014	41-42	Ribo-	Liver_T21	Species-specific	No
HSA_CIRCpedia_48392	Human (hg38)	HTT	ENST00000355072.9	Chr4:3086938â€“3107423	+	0.195	2-6	Ribo-	Liver_T22	MMU_CIRCpedia_17475	Yes
HSA_CIRCpedia_48434	Human (hg38)	HTT	ENST00000355072.9	Chr4:3186596â€“3189093	+	0.026	38-40	Ribo-	Liver_T22	Species-specific	No
HSA_CIRCpedia_102730	Human (hg38)	HTT	ENST00000355072.9	Chr4:3130304â€“3140656	+	0.013	14-22	Ribo-	Liver_T22	Species-specific	No
HSA_CIRCpedia_48435	Human (hg38)	HTT	ENST00000355072.9	Chr4:3186596â€“3199939	+	0.013	38-41	Ribo-	Liver_T22	Species-specific	No
HSA_CIRCpedia_48423	Human (hg38)	HTT	ENST00000355072.9	Chr4:3154292â€“3157199	+	0.013	27-28	Ribo-	Liver_T22	MMU_CIRCpedia_212182	No
HSA_CIRCpedia_357599	Human (hg38)	HTT	ENST00000355072.9	Chr4:3125548â€“3131397	+	0.013	11-15	Ribo-	Liver_T22	Species-specific	No
HSA_CIRCpedia_48432	Human (hg38)	HTT	ENST00000355072.9	Chr4:3182353â€“3204148	+	0.013	37-42	Ribo-	Liver_T22	Species-specific	No
HSA_CIRCpedia_48392	Human (hg38)	HTT	ENST00000355072.9	Chr4:3086938â€“3107423	+	0.207	2-6	Ribo-	Liver_T3	MMU_CIRCpedia_17475	Yes
HSA_CIRCpedia_368160	Human (hg38)	HTT	ENST00000355072.9	Chr4:3236148â€“3238609	+	0.014	64-65	Ribo-	Liver_T3	Species-specific	No
HSA_CIRCpedia_368159	Human (hg38)	HTT	ENST00000355072.9	Chr4:3086938â€“3178446	+	0.014	2-35	Ribo-	Liver_T3	Species-specific	No
HSA_CIRCpedia_48392	Human (hg38)	HTT	ENST00000355072.9	Chr4:3086938â€“3107423	+	0.277	2-6	Ribo-	Liver_T6	MMU_CIRCpedia_17475	Yes
HSA_CIRCpedia_48434	Human (hg38)	HTT	ENST00000355072.9	Chr4:3186596â€“3189093	+	0.043	38-40	Ribo-	Liver_T6	Species-specific	Yes
HSA_CIRCpedia_48389	Human (hg38)	HTT	ENST00000355072.9	Chr4:3086938â€“3099394	+	0.029	2-3	Ribo-	Liver_T6	Species-specific	No
HSA_CIRCpedia_48398	Human (hg38)	HTT	ENST00000355072.9	Chr4:3086938â€“3136326	+	0.014	2-21	Ribo-	Liver_T6	Species-specific	No
HSA_CIRCpedia_48392	Human (hg38)	HTT	ENST00000355072.9	Chr4:3086938â€“3107423	+	0.218	2-6	Ribo-	Liver_T7	MMU_CIRCpedia_17475	Yes
HSA_CIRCpedia_48405	Human (hg38)	HTT	ENST00000355072.9	Chr4:3103823â€“3107423	+	0.062	4-6	Ribo-	Liver_T7	Species-specific	No
HSA_CIRCpedia_102734	Human (hg38)	HTT	ENST00000355072.9	Chr4:3154292â€“3160392	+	0.015	27-29	Ribo-	Liver_T7	MMU_CIRCpedia_226010	No
HSA_CIRCpedia_48392	Human (hg38)	HTT	ENST00000355072.9	Chr4:3086938â€“3107423	+	0.203	2-6	Ribo-	Liver_T8	MMU_CIRCpedia_17475	Yes
HSA_CIRCpedia_48434	Human (hg38)	HTT	ENST00000355072.9	Chr4:3186596â€“3189093	+	0.04	38-40	Ribo-	Liver_T8	Species-specific	Yes
HSA_CIRCpedia_48389	Human (hg38)	HTT	ENST00000355072.9	Chr4:3086938â€“3099394	+	0.027	2-3	Ribo-	Liver_T8	Species-specific	No
HSA_CIRCpedia_48392	Human (hg38)	HTT	ENST00000355072.9	Chr4:3086938â€“3107423	+	0.238	2-6	Ribo-	Lung	MMU_CIRCpedia_17475	Yes
HSA_CIRCpedia_48423	Human (hg38)	HTT	ENST00000355072.9	Chr4:3154292â€“3157199	+	0.072	27-28	Ribo-	Lung	MMU_CIRCpedia_212182	Yes
HSA_CIRCpedia_158858	Human (hg38)	HTT	ENST00000355072.9	Chr4:3086938â€“3115445	+	0.031	2-7	Ribo-	Lung	Species-specific	No
HSA_CIRCpedia_341849	Human (hg38)	HTT	ENST00000355072.9	Chr4:3145151â€“3204148	+	0.031	24-42	Ribo-	Lung	Species-specific	No
HSA_CIRCpedia_48434	Human (hg38)	HTT	ENST00000355072.9	Chr4:3186596â€“3189093	+	0.031	38-40	Ribo-	Lung	Species-specific	No
HSA_CIRCpedia_357599	Human (hg38)	HTT	ENST00000355072.9	Chr4:3125548â€“3131397	+	0.01	11-15	Ribo-	Lung	Species-specific	No
HSA_CIRCpedia_48392	Human (hg38)	HTT	ENST00000355072.9	Chr4:3086938â€“3107423	+	0.087	2-6	poly(A)-	NHEK	MMU_CIRCpedia_17475	Yes
HSA_CIRCpedia_48393	Human (hg38)	HTT	ENST00000355072.9	Chr4:3086938â€“3116263	+	0.038	2-8	poly(A)-	NHEK	Species-specific	No
HSA_CIRCpedia_48422	Human (hg38)	HTT	ENST00000355072.9	Chr4:3148004â€“3154419	+	0.032	26-27	poly(A)-	NHEK	Species-specific	No
HSA_CIRCpedia_48430	Human (hg38)	HTT	ENST00000355072.9	Chr4:3182353â€“3189093	+	0.032	37-40	poly(A)-	NHEK	Species-specific	No
HSA_CIRCpedia_48401	Human (hg38)	HTT	ENST00000355072.9	Chr4:3086938â€“3172397	+	0.016	2-30	poly(A)-	NHEK	Species-specific	No
HSA_CIRCpedia_48404	Human (hg38)	HTT	ENST00000355072.9	Chr4:3099273â€“3107423	+	0.016	3-6	poly(A)-	NHEK	MMU_CIRCpedia_223381	No
HSA_CIRCpedia_48389	Human (hg38)	HTT	ENST00000355072.9	Chr4:3086938â€“3099394	+	0.016	2-3	poly(A)-	NHEK	Species-specific	No
HSA_CIRCpedia_48418	Human (hg38)	HTT	ENST00000355072.9	Chr4:3134400â€“3160392	+	0.016	19-29	poly(A)-	NHEK	Species-specific	No
HSA_CIRCpedia_48392	Human (hg38)	HTT	ENST00000355072.9	Chr4:3086938â€“3107423	+	1.898	2-6	Ribo-	Occipital	MMU_CIRCpedia_17475	Yes
HSA_CIRCpedia_48423	Human (hg38)	HTT	ENST00000355072.9	Chr4:3154292â€“3157199	+	1.236	27-28	Ribo-	Occipital	MMU_CIRCpedia_212182	Yes
HSA_CIRCpedia_48434	Human (hg38)	HTT	ENST00000355072.9	Chr4:3186596â€“3189093	+	0.44	38-40	Ribo-	Occipital	Species-specific	Yes
HSA_CIRCpedia_48405	Human (hg38)	HTT	ENST00000355072.9	Chr4:3103823â€“3107423	+	0.367	4-6	Ribo-	Occipital	Species-specific	Yes
HSA_CIRCpedia_48412	Human (hg38)	HTT	ENST00000355072.9	Chr4:3122888â€“3125629	+	0.134	10-11	Ribo-	Occipital	Species-specific	Yes
HSA_CIRCpedia_48438	Human (hg38)	HTT	ENST00000355072.9	Chr4:3199731â€“3204148	+	0.048	41-42	Ribo-	Occipital	Species-specific	No
HSA_CIRCpedia_48404	Human (hg38)	HTT	ENST00000355072.9	Chr4:3099273â€“3107423	+	0.048	3-6	Ribo-	Occipital	MMU_CIRCpedia_223381	No
HSA_CIRCpedia_48430	Human (hg38)	HTT	ENST00000355072.9	Chr4:3182353â€“3189093	+	0.048	37-40	Ribo-	Occipital	Species-specific	No
HSA_CIRCpedia_102734	Human (hg38)	HTT	ENST00000355072.9	Chr4:3154292â€“3160392	+	0.036	27-29	Ribo-	Occipital	MMU_CIRCpedia_226010	No
HSA_CIRCpedia_158858	Human (hg38)	HTT	ENST00000355072.9	Chr4:3086938â€“3115445	+	0.024	2-7	Ribo-	Occipital	Species-specific	No
HSA_CIRCpedia_48435	Human (hg38)	HTT	ENST00000355072.9	Chr4:3186596â€“3199939	+	0.024	38-41	Ribo-	Occipital	Species-specific	No
HSA_CIRCpedia_158859	Human (hg38)	HTT	ENST00000355072.9	Chr4:3130304â€“3136326	+	0.012	14-21	Ribo-	Occipital	Species-specific	No
HSA_CIRCpedia_102732	Human (hg38)	HTT	ENST00000355072.9	Chr4:3135903â€“3136326	+	0.012	20-21	Ribo-	Occipital	Species-specific	No
HSA_CIRCpedia_48436	Human (hg38)	HTT	ENST00000355072.9	Chr4:3186596â€“3204148	+	0.012	38-42	Ribo-	Occipital	Species-specific	No
HSA_CIRCpedia_48392	Human (hg38)	HTT	ENST00000355072.9	Chr4:3086938â€“3107423	+	1.182	2-6	RNase R	PA1	MMU_CIRCpedia_17475	Yes
HSA_CIRCpedia_48434	Human (hg38)	HTT	ENST00000355072.9	Chr4:3186596â€“3189093	+	0.276	38-40	RNase R	PA1	Species-specific	Yes
HSA_CIRCpedia_48393	Human (hg38)	HTT	ENST00000355072.9	Chr4:3086938â€“3116263	+	0.153	2-8	RNase R	PA1	Species-specific	Yes
HSA_CIRCpedia_48389	Human (hg38)	HTT	ENST00000355072.9	Chr4:3086938â€“3099394	+	0.138	2-3	RNase R	PA1	Species-specific	Yes
HSA_CIRCpedia_48435	Human (hg38)	HTT	ENST00000355072.9	Chr4:3186596â€“3199939	+	0.122	38-41	RNase R	PA1	Species-specific	Yes
HSA_CIRCpedia_48423	Human (hg38)	HTT	ENST00000355072.9	Chr4:3154292â€“3157199	+	0.092	27-28	RNase R	PA1	MMU_CIRCpedia_212182	Yes
HSA_CIRCpedia_48405	Human (hg38)	HTT	ENST00000355072.9	Chr4:3103823â€“3107423	+	0.076	4-6	RNase R	PA1	Species-specific	Yes
HSA_CIRCpedia_48392	Human (hg38)	HTT	ENST00000355072.9	Chr4:3086938â€“3107423	+	0.061	2-6	poly(A)-	PA1	MMU_CIRCpedia_17475	Yes
HSA_CIRCpedia_48392	Human (hg38)	HTT	ENST00000355072.9	Chr4:3086938â€“3107423	+	0.059	2-6	Ribo-	PA1	MMU_CIRCpedia_17475	Yes
HSA_CIRCpedia_48430	Human (hg38)	HTT	ENST00000355072.9	Chr4:3182353â€“3189093	+	0.046	37-40	RNase R	PA1	Species-specific	Yes
HSA_CIRCpedia_48429	Human (hg38)	HTT	ENST00000355072.9	Chr4:3180514â€“3189093	+	0.046	36-40	RNase R	PA1	MMU_CIRCpedia_17522	No
HSA_CIRCpedia_48434	Human (hg38)	HTT	ENST00000355072.9	Chr4:3186596â€“3189093	+	0.037	38-40	poly(A)-	PA1	Species-specific	Yes
HSA_CIRCpedia_48405	Human (hg38)	HTT	ENST00000355072.9	Chr4:3103823â€“3107423	+	0.033	4-6	Ribo-	PA1	Species-specific	No
HSA_CIRCpedia_48397	Human (hg38)	HTT	ENST00000355072.9	Chr4:3086938â€“3134540	+	0.03	2-19	RNase R	PA1	Species-specific	No
HSA_CIRCpedia_48434	Human (hg38)	HTT	ENST00000355072.9	Chr4:3186596â€“3189093	+	0.025	38-40	Ribo-	PA1	Species-specific	No
HSA_CIRCpedia_48431	Human (hg38)	HTT	ENST00000355072.9	Chr4:3182353â€“3199939	+	0.024	37-41	poly(A)-	PA1	Species-specific	No
HSA_CIRCpedia_48393	Human (hg38)	HTT	ENST00000355072.9	Chr4:3086938â€“3116263	+	0.024	2-8	poly(A)-	PA1	Species-specific	No
HSA_CIRCpedia_48427	Human (hg38)	HTT	ENST00000355072.9	Chr4:3174720â€“3189093	+	0.015	32-40	RNase R	PA1	Species-specific	No
HSA_CIRCpedia_48438	Human (hg38)	HTT	ENST00000355072.9	Chr4:3199731â€“3204148	+	0.015	41-42	RNase R	PA1	Species-specific	No
HSA_CIRCpedia_48425	Human (hg38)	HTT	ENST00000355072.9	Chr4:3157071â€“3175107	+	0.015	28-33	RNase R	PA1	Species-specific	No
HSA_CIRCpedia_48417	Human (hg38)	HTT	ENST00000355072.9	Chr4:3134400â€“3134540	+	0.015	19-19	RNase R	PA1	Species-specific	No
HSA_CIRCpedia_48432	Human (hg38)	HTT	ENST00000355072.9	Chr4:3182353â€“3204148	+	0.015	37-42	RNase R	PA1	Species-specific	No
HSA_CIRCpedia_48431	Human (hg38)	HTT	ENST00000355072.9	Chr4:3182353â€“3199939	+	0.015	37-41	RNase R	PA1	Species-specific	No
HSA_CIRCpedia_48437	Human (hg38)	HTT	ENST00000355072.9	Chr4:3187650â€“3189093	+	0.015	39-40	RNase R	PA1	Species-specific	No
HSA_CIRCpedia_48394	Human (hg38)	HTT	ENST00000355072.9	Chr4:3086938â€“3121432	+	0.015	2-9	RNase R	PA1	Species-specific	No
HSA_CIRCpedia_48391	Human (hg38)	HTT	ENST00000355072.9	Chr4:3086938â€“3105436	+	0.015	2-5	RNase R	PA1	MMU_CIRCpedia_17474	No
HSA_CIRCpedia_48409	Human (hg38)	HTT	ENST00000355072.9	Chr4:3105356â€“3107423	+	0.015	5-6	RNase R	PA1	Species-specific	No
HSA_CIRCpedia_48440	Human (hg38)	HTT	ENST00000355072.9	Chr4:3206495â€“3209949	+	0.015	43-47	RNase R	PA1	Species-specific	No
HSA_CIRCpedia_48412	Human (hg38)	HTT	ENST00000355072.9	Chr4:3122888â€“3125629	+	0.012	10-11	poly(A)-	PA1	Species-specific	No
HSA_CIRCpedia_48400	Human (hg38)	HTT	ENST00000355072.9	Chr4:3086938â€“3160392	+	0.012	2-29	poly(A)-	PA1	Species-specific	No
HSA_CIRCpedia_48435	Human (hg38)	HTT	ENST00000355072.9	Chr4:3186596â€“3199939	+	0.008	38-41	Ribo-	PA1	Species-specific	No
HSA_CIRCpedia_48401	Human (hg38)	HTT	ENST00000355072.9	Chr4:3086938â€“3172397	+	0.008	2-30	Ribo-	PA1	Species-specific	No
HSA_CIRCpedia_158858	Human (hg38)	HTT	ENST00000355072.9	Chr4:3086938â€“3115445	+	0.008	2-7	Ribo-	PA1	Species-specific	No
HSA_CIRCpedia_48436	Human (hg38)	HTT	ENST00000355072.9	Chr4:3186596â€“3204148	+	0.008	38-42	Ribo-	PA1	Species-specific	No
HSA_CIRCpedia_48392	Human (hg38)	HTT	ENST00000355072.9	Chr4:3086938â€“3107423	+	1.15	2-6	Ribo-	Parietal	MMU_CIRCpedia_17475	Yes
HSA_CIRCpedia_48423	Human (hg38)	HTT	ENST00000355072.9	Chr4:3154292â€“3157199	+	0.946	27-28	Ribo-	Parietal	MMU_CIRCpedia_212182	Yes
HSA_CIRCpedia_48405	Human (hg38)	HTT	ENST00000355072.9	Chr4:3103823â€“3107423	+	0.376	4-6	Ribo-	Parietal	Species-specific	Yes
HSA_CIRCpedia_48434	Human (hg38)	HTT	ENST00000355072.9	Chr4:3186596â€“3189093	+	0.182	38-40	Ribo-	Parietal	Species-specific	Yes
HSA_CIRCpedia_102734	Human (hg38)	HTT	ENST00000355072.9	Chr4:3154292â€“3160392	+	0.053	27-29	Ribo-	Parietal	MMU_CIRCpedia_226010	Yes
HSA_CIRCpedia_48389	Human (hg38)	HTT	ENST00000355072.9	Chr4:3086938â€“3099394	+	0.043	2-3	Ribo-	Parietal	Species-specific	Yes
HSA_CIRCpedia_48412	Human (hg38)	HTT	ENST00000355072.9	Chr4:3122888â€“3125629	+	0.043	10-11	Ribo-	Parietal	Species-specific	No
HSA_CIRCpedia_48435	Human (hg38)	HTT	ENST00000355072.9	Chr4:3186596â€“3199939	+	0.043	38-41	Ribo-	Parietal	Species-specific	Yes
HSA_CIRCpedia_48432	Human (hg38)	HTT	ENST00000355072.9	Chr4:3182353â€“3204148	+	0.043	37-42	Ribo-	Parietal	Species-specific	No
HSA_CIRCpedia_48431	Human (hg38)	HTT	ENST00000355072.9	Chr4:3182353â€“3199939	+	0.032	37-41	Ribo-	Parietal	Species-specific	No
HSA_CIRCpedia_158859	Human (hg38)	HTT	ENST00000355072.9	Chr4:3130304â€“3136326	+	0.032	14-21	Ribo-	Parietal	Species-specific	No
HSA_CIRCpedia_164728	Human (hg38)	HTT	ENST00000355072.9	Chr4:3121227â€“3136326	+	0.032	9-21	Ribo-	Parietal	Species-specific	No
HSA_CIRCpedia_164729	Human (hg38)	HTT	ENST00000355072.9	Chr4:3135903â€“3140656	+	0.021	20-22	Ribo-	Parietal	Species-specific	No
HSA_CIRCpedia_48440	Human (hg38)	HTT	ENST00000355072.9	Chr4:3206495â€“3209949	+	0.021	43-47	Ribo-	Parietal	Species-specific	No
HSA_CIRCpedia_102732	Human (hg38)	HTT	ENST00000355072.9	Chr4:3135903â€“3136326	+	0.021	20-21	Ribo-	Parietal	Species-specific	No
HSA_CIRCpedia_48390	Human (hg38)	HTT	ENST00000355072.9	Chr4:3086938â€“3103883	+	0.021	2-4	Ribo-	Parietal	Species-specific	No
HSA_CIRCpedia_164731	Human (hg38)	HTT	ENST00000355072.9	Chr4:3140509â€“3154419	+	0.021	22-27	Ribo-	Parietal	Species-specific	No
HSA_CIRCpedia_164730	Human (hg38)	HTT	ENST00000355072.9	Chr4:3136225â€“3140656	+	0.01	21-22	Ribo-	Parietal	Species-specific	No
HSA_CIRCpedia_48427	Human (hg38)	HTT	ENST00000355072.9	Chr4:3174720â€“3189093	+	0.01	32-40	Ribo-	Parietal	Species-specific	No
HSA_CIRCpedia_48393	Human (hg38)	HTT	ENST00000355072.9	Chr4:3086938â€“3116263	+	0.01	2-8	Ribo-	Parietal	Species-specific	No
HSA_CIRCpedia_48395	Human (hg38)	HTT	ENST00000355072.9	Chr4:3086938â€“3125629	+	0.01	2-11	Ribo-	Parietal	Species-specific	No
HSA_CIRCpedia_48392	Human (hg38)	HTT	ENST00000355072.9	Chr4:3086938â€“3107423	+	0.339	2-6	Ribo-	SH-SY5Y_D0_exp1	MMU_CIRCpedia_17475	Yes
HSA_CIRCpedia_48394	Human (hg38)	HTT	ENST00000355072.9	Chr4:3086938â€“3121432	+	0.048	2-9	Ribo-	SH-SY5Y_D0_exp1	Species-specific	No
HSA_CIRCpedia_113793	Human (hg38)	HTT	ENST00000355072.9	Chr4:3142765â€“3180651	+	0.048	23-36	Ribo-	SH-SY5Y_D0_exp1	Species-specific	No
HSA_CIRCpedia_48393	Human (hg38)	HTT	ENST00000355072.9	Chr4:3086938â€“3116263	+	0.048	2-8	Ribo-	SH-SY5Y_D0_exp1	Species-specific	No
HSA_CIRCpedia_48391	Human (hg38)	HTT	ENST00000355072.9	Chr4:3086938â€“3105436	+	0.048	2-5	Ribo-	SH-SY5Y_D0_exp1	MMU_CIRCpedia_17474	No
HSA_CIRCpedia_48392	Human (hg38)	HTT	ENST00000355072.9	Chr4:3086938â€“3107423	+	0.109	2-6	Ribo-	SH-SY5Y_D0_exp2	MMU_CIRCpedia_17475	Yes
HSA_CIRCpedia_48402	Human (hg38)	HTT	ENST00000355072.9	Chr4:3086938â€“3189093	+	0.036	2-40	Ribo-	SH-SY5Y_D0_exp2	Species-specific	No
HSA_CIRCpedia_48392	Human (hg38)	HTT	ENST00000355072.9	Chr4:3086938â€“3107423	+	0.644	2-6	Ribo-	SH-SY5Y_D2_exp1	MMU_CIRCpedia_17475	Yes
HSA_CIRCpedia_48434	Human (hg38)	HTT	ENST00000355072.9	Chr4:3186596â€“3189093	+	0.058	38-40	Ribo-	SH-SY5Y_D2_exp1	Species-specific	No
HSA_CIRCpedia_48411	Human (hg38)	HTT	ENST00000355072.9	Chr4:3121227â€“3125629	+	0.058	9-11	Ribo-	SH-SY5Y_D2_exp1	Species-specific	No
HSA_CIRCpedia_48412	Human (hg38)	HTT	ENST00000355072.9	Chr4:3122888â€“3125629	+	0.058	10-11	Ribo-	SH-SY5Y_D2_exp1	Species-specific	No
HSA_CIRCpedia_48430	Human (hg38)	HTT	ENST00000355072.9	Chr4:3182353â€“3189093	+	0.058	37-40	Ribo-	SH-SY5Y_D2_exp1	Species-specific	No
HSA_CIRCpedia_48392	Human (hg38)	HTT	ENST00000355072.9	Chr4:3086938â€“3107423	+	0.392	2-6	Ribo-	SH-SY5Y_D4_exp1	MMU_CIRCpedia_17475	Yes
HSA_CIRCpedia_48398	Human (hg38)	HTT	ENST00000355072.9	Chr4:3086938â€“3136326	+	0.056	2-21	Ribo-	SH-SY5Y_D4_exp1	Species-specific	No
HSA_CIRCpedia_48435	Human (hg38)	HTT	ENST00000355072.9	Chr4:3186596â€“3199939	+	0.056	38-41	Ribo-	SH-SY5Y_D4_exp1	Species-specific	No
HSA_CIRCpedia_48395	Human (hg38)	HTT	ENST00000355072.9	Chr4:3086938â€“3125629	+	0.056	2-11	Ribo-	SH-SY5Y_D4_exp1	Species-specific	No
HSA_CIRCpedia_48434	Human (hg38)	HTT	ENST00000355072.9	Chr4:3186596â€“3189093	+	0.056	38-40	Ribo-	SH-SY5Y_D4_exp1	Species-specific	No
HSA_CIRCpedia_48402	Human (hg38)	HTT	ENST00000355072.9	Chr4:3086938â€“3189093	+	0.056	2-40	Ribo-	SH-SY5Y_D4_exp1	Species-specific	No
HSA_CIRCpedia_48392	Human (hg38)	HTT	ENST00000355072.9	Chr4:3086938â€“3107423	+	0.129	2-6	Ribo-	SH-SY5Y_D4_exp2	MMU_CIRCpedia_17475	No
HSA_CIRCpedia_48423	Human (hg38)	HTT	ENST00000355072.9	Chr4:3154292â€“3157199	+	0.043	27-28	Ribo-	SH-SY5Y_D4_exp2	MMU_CIRCpedia_212182	No
HSA_CIRCpedia_117720	Human (hg38)	HTT	ENST00000355072.9	Chr4:3129923â€“3189093	+	0.043	13-40	Ribo-	SH-SY5Y_D4_exp2	Species-specific	No
HSA_CIRCpedia_48392	Human (hg38)	HTT	ENST00000355072.9	Chr4:3086938â€“3107423	+	0.043	2-6	Ribo-	SH-SY5Y_D8_exp2	MMU_CIRCpedia_17475	No
HSA_CIRCpedia_48392	Human (hg38)	HTT	ENST00000355072.9	Chr4:3086938â€“3107423	+	0.005	2-6	poly(A)-	SK_N_SH	MMU_CIRCpedia_17475	No
HSA_CIRCpedia_48392	Human (hg38)	HTT	ENST00000355072.9	Chr4:3086938â€“3107423	+	0.628	2-6	Ribo-	Stomach	MMU_CIRCpedia_17475	Yes
HSA_CIRCpedia_48404	Human (hg38)	HTT	ENST00000355072.9	Chr4:3099273â€“3107423	+	0.05	3-6	Ribo-	Stomach	MMU_CIRCpedia_223381	No
HSA_CIRCpedia_48392	Human (hg38)	HTT	ENST00000355072.9	Chr4:3086938â€“3107423	+	1.355	2-6	Ribo-	Temporal	MMU_CIRCpedia_17475	Yes
HSA_CIRCpedia_48423	Human (hg38)	HTT	ENST00000355072.9	Chr4:3154292â€“3157199	+	0.534	27-28	Ribo-	Temporal	MMU_CIRCpedia_212182	Yes
HSA_CIRCpedia_48405	Human (hg38)	HTT	ENST00000355072.9	Chr4:3103823â€“3107423	+	0.48	4-6	Ribo-	Temporal	Species-specific	Yes
HSA_CIRCpedia_48434	Human (hg38)	HTT	ENST00000355072.9	Chr4:3186596â€“3189093	+	0.193	38-40	Ribo-	Temporal	Species-specific	Yes
HSA_CIRCpedia_48404	Human (hg38)	HTT	ENST00000355072.9	Chr4:3099273â€“3107423	+	0.131	3-6	Ribo-	Temporal	MMU_CIRCpedia_223381	Yes
HSA_CIRCpedia_48389	Human (hg38)	HTT	ENST00000355072.9	Chr4:3086938â€“3099394	+	0.046	2-3	Ribo-	Temporal	Species-specific	No
HSA_CIRCpedia_102734	Human (hg38)	HTT	ENST00000355072.9	Chr4:3154292â€“3160392	+	0.03	27-29	Ribo-	Temporal	MMU_CIRCpedia_226010	No
HSA_CIRCpedia_48436	Human (hg38)	HTT	ENST00000355072.9	Chr4:3186596â€“3204148	+	0.03	38-42	Ribo-	Temporal	Species-specific	No
HSA_CIRCpedia_48430	Human (hg38)	HTT	ENST00000355072.9	Chr4:3182353â€“3189093	+	0.023	37-40	Ribo-	Temporal	Species-specific	No
HSA_CIRCpedia_48435	Human (hg38)	HTT	ENST00000355072.9	Chr4:3186596â€“3199939	+	0.015	38-41	Ribo-	Temporal	Species-specific	No
HSA_CIRCpedia_169567	Human (hg38)	HTT	ENST00000355072.9	Chr4:3122888â€“3131775	+	0.007	10-16	Ribo-	Temporal	Species-specific	No
HSA_CIRCpedia_102735	Human (hg38)	HTT	ENST00000355072.9	Chr4:3174720â€“3182470	+	0.007	32-37	Ribo-	Temporal	Species-specific	No
HSA_CIRCpedia_169566	Human (hg38)	HTT	ENST00000355072.9	Chr4:3121227â€“3127604	+	0.007	9-12	Ribo-	Temporal	Species-specific	No
HSA_CIRCpedia_48392	Human (hg38)	HTT	ENST00000355072.9	Chr4:3086938â€“3107423	+	0.839	2-6	Ribo-	Thyroid	MMU_CIRCpedia_17475	Yes
HSA_CIRCpedia_48434	Human (hg38)	HTT	ENST00000355072.9	Chr4:3186596â€“3189093	+	0.119	38-40	Ribo-	Thyroid	Species-specific	No
HSA_CIRCpedia_48405	Human (hg38)	HTT	ENST00000355072.9	Chr4:3103823â€“3107423	+	0.026	4-6	Ribo-	Thyroid	Species-specific	No
HSA_CIRCpedia_48430	Human (hg38)	HTT	ENST00000355072.9	Chr4:3182353â€“3189093	+	0.013	37-40	Ribo-	Thyroid	Species-specific	No
HSA_CIRCpedia_48435	Human (hg38)	HTT	ENST00000355072.9	Chr4:3186596â€“3199939	+	0.064	38-41	poly(A)-	A549	Species-specific	No
HSA_CIRCpedia_48432	Human (hg38)	HTT	ENST00000355072.9	Chr4:3182353â€“3204148	+	0.038	37-42	poly(A)-	A549	Species-specific	No
HSA_CIRCpedia_48420	Human (hg38)	HTT	ENST00000355072.9	Chr4:3142765â€“3199939	+	0.012	23-41	poly(A)-	A549	Species-specific	No
HSA_CIRCpedia_48395	Human (hg38)	HTT	ENST00000355072.9	Chr4:3086938â€“3125629	+	0.012	2-11	poly(A)-	A549	Species-specific	No

## Sheet: Mouse HTT circRNAs
circID	Species	Gene	Isoform	Location	Strand	FPM	Exon Start-Exon End	Seq Type	Cell Line	Conservation	Mapsplice
MMU_CIRCpedia_214889	Mouse (mm10)	Htt	uc008xda.1	Chr5:34794104â€“34804680	+	0.089	3-7	Ribo-	Brain_14wks_2	HSA_CIRCpedia_102722	N.A.
MMU_CIRCpedia_17475	Mouse (mm10)	Htt	uc008xda.1	Chr5:34782741â€“34799515	+	0.181	2-6	Ribo-	Brain_20wks_1	HSA_CIRCpedia_48392	N.A.
MMU_CIRCpedia_212182	Mouse (mm10)	Htt	NM_010414	Chr5:34832566â€“34834388	+	0.387	27-28	Ribo-	Brain_20wks_2	HSA_CIRCpedia_48423	N.A.
MMU_CIRCpedia_17475	Mouse (mm10)	Htt	uc008xda.1	Chr5:34782741â€“34799515	+	0.193	2-6	Ribo-	Brain_20wks_2	HSA_CIRCpedia_48392	N.A.
MMU_CIRCpedia_17497	Mouse (mm10)	Htt	NM_010414	Chr5:34819950â€“34823924	+	0.025	17-20	Ribo-	Brain_lysate	Species-specific	N.A.
MMU_CIRCpedia_17489	Mouse (mm10)	Htt	NM_010414	Chr5:34817142â€“34820299	+	0.023	13-18	Ribo-	Cerebellum	Species-specific	N.A.
MMU_CIRCpedia_17522	Mouse (mm10)	Htt	NM_010414	Chr5:34852759â€“34866717	+	0.023	36-40	Ribo-	Cerebellum	HSA_CIRCpedia_48429	N.A.
MMU_CIRCpedia_17480	Mouse (mm10)	Htt	ENSMUST00000148953	Chr5:34790266â€“34795971	+	0.023	3-5	Ribo-	Cerebellum	Species-specific	N.A.
MMU_CIRCpedia_17474	Mouse (mm10)	Htt	uc008xda.1	Chr5:34782741â€“34795971	+	0.025	2-4	Ribo-	Cytoplasm	HSA_CIRCpedia_48391	N.A.
MMU_CIRCpedia_17509	Mouse (mm10)	Htt	NM_010414	Chr5:34834260â€“34854791	+	0.046	28-37	Ribo-	E18_2	Species-specific	N.A.
MMU_CIRCpedia_17510	Mouse (mm10)	Htt	NM_010414	Chr5:34834260â€“34864878	+	0.075	28-39	Ribo-	Forebrain	Species-specific	N.A.
MMU_CIRCpedia_17475	Mouse (mm10)	Htt	uc008xda.1	Chr5:34782741â€“34799515	+	0.012	2-6	Ribo-	Forebrain	HSA_CIRCpedia_48392	N.A.
MMU_CIRCpedia_17509	Mouse (mm10)	Htt	NM_010414	Chr5:34834260â€“34854791	+	0.067	28-37	Ribo-	Hindbrain	Species-specific	N.A.
MMU_CIRCpedia_17475	Mouse (mm10)	Htt	uc008xda.1	Chr5:34782741â€“34799515	+	0.116	2-6	Ribo-	Homogenate	HSA_CIRCpedia_48392	N.A.
MMU_CIRCpedia_218801	Mouse (mm10)	Htt	NM_010414	Chr5:34817697â€“34823924	+	0.023	14-20	Ribo-	Homogenate	Species-specific	N.A.
MMU_CIRCpedia_17475	Mouse (mm10)	Htt	uc008xda.1	Chr5:34782741â€“34799515	+	0.025	2-6	Ribo-	Lung_14wks	HSA_CIRCpedia_48392	N.A.
MMU_CIRCpedia_17497	Mouse (mm10)	Htt	NM_010414	Chr5:34819950â€“34823924	+	0.051	17-20	Ribo-	Neuropil_1	Species-specific	N.A.
MMU_CIRCpedia_17490	Mouse (mm10)	Htt	NM_010414	Chr5:34817697â€“34826067	+	0.047	14-23	Ribo-	P1_1	Species-specific	N.A.
MMU_CIRCpedia_222312	Mouse (mm10)	Htt	NM_010414	Chr5:34882849â€“34894445	+	0.047	48-54	Ribo-	P1_1	Species-specific	N.A.
MMU_CIRCpedia_17509	Mouse (mm10)	Htt	NM_010414	Chr5:34834260â€“34854791	+	0.047	28-37	Ribo-	P1_1	Species-specific	N.A.
MMU_CIRCpedia_17490	Mouse (mm10)	Htt	NM_010414	Chr5:34817697â€“34826067	+	0.121	14-23	Ribo-	P10_1	Species-specific	N.A.
MMU_CIRCpedia_17475	Mouse (mm10)	Htt	uc008xda.1	Chr5:34782741â€“34799515	+	0.06	2-6	Ribo-	P10_1	HSA_CIRCpedia_48392	N.A.
MMU_CIRCpedia_17497	Mouse (mm10)	Htt	NM_010414	Chr5:34819950â€“34823924	+	0.06	17-20	Ribo-	P10_1	Species-specific	N.A.
MMU_CIRCpedia_17490	Mouse (mm10)	Htt	NM_010414	Chr5:34817697â€“34826067	+	0.04	14-23	Ribo-	P10_2	Species-specific	N.A.
MMU_CIRCpedia_17509	Mouse (mm10)	Htt	NM_010414	Chr5:34834260â€“34854791	+	0.014	28-37	Ribo-	P19_D0_rep2	Species-specific	N.A.
MMU_CIRCpedia_17510	Mouse (mm10)	Htt	NM_010414	Chr5:34834260â€“34864878	+	0.036	28-39	Ribo-	P19_D12	Species-specific	N.A.
MMU_CIRCpedia_17497	Mouse (mm10)	Htt	NM_010414	Chr5:34819950â€“34823924	+	0.038	17-20	Ribo-	P19_D2	Species-specific	N.A.
MMU_CIRCpedia_17490	Mouse (mm10)	Htt	NM_010414	Chr5:34817697â€“34826067	+	0.029	14-23	Ribo-	P19_D4_rep2	Species-specific	N.A.
MMU_CIRCpedia_223381	Mouse (mm10)	Htt	ENSMUST00000148953	Chr5:34790266â€“34799515	+	0.042	3-6	Ribo-	P30_1	HSA_CIRCpedia_48404	N.A.
MMU_CIRCpedia_223382	Mouse (mm10)	Htt	NM_010414	Chr5:34817142â€“34834388	+	0.042	13-28	Ribo-	P30_1	Species-specific	N.A.
MMU_CIRCpedia_17490	Mouse (mm10)	Htt	NM_010414	Chr5:34817697â€“34826067	+	0.075	14-23	Ribo-	P30_2	Species-specific	N.A.
MMU_CIRCpedia_225024	Mouse (mm10)	Htt	NM_010414	Chr5:34828472â€“34832693	+	0.037	25-27	Ribo-	P30_2	Species-specific	N.A.
MMU_CIRCpedia_17496	Mouse (mm10)	Htt	NM_010414	Chr5:34819950â€“34820299	+	0.019	17-18	Ribo-	Prefrontal_cortex	Species-specific	N.A.
MMU_CIRCpedia_17474	Mouse (mm10)	Htt	uc008xda.1	Chr5:34782741â€“34795971	+	0.019	2-4	Ribo-	Prefrontal_cortex	HSA_CIRCpedia_48391	N.A.
MMU_CIRCpedia_17475	Mouse (mm10)	Htt	uc008xda.1	Chr5:34782741â€“34799515	+	0.027	2-6	Ribo-	Primary_Neurons_D14	HSA_CIRCpedia_48392	N.A.
MMU_CIRCpedia_17490	Mouse (mm10)	Htt	NM_010414	Chr5:34817697â€“34826067	+	0.027	14-23	Ribo-	Primary_Neurons_D14	Species-specific	N.A.
MMU_CIRCpedia_17509	Mouse (mm10)	Htt	NM_010414	Chr5:34834260â€“34854791	+	0.027	28-37	Ribo-	Primary_Neurons_D14	Species-specific	N.A.
MMU_CIRCpedia_17484	Mouse (mm10)	Htt	ENSMUST00000148953	Chr5:34803717â€“34813192	+	0.027	7-12	Ribo-	Primary_Neurons_D14	Species-specific	N.A.
MMU_CIRCpedia_17497	Mouse (mm10)	Htt	NM_010414	Chr5:34819950â€“34823924	+	0.027	17-20	Ribo-	Primary_Neurons_D14	Species-specific	N.A.
MMU_CIRCpedia_17475	Mouse (mm10)	Htt	uc008xda.1	Chr5:34782741â€“34799515	+	0.053	2-6	Ribo-	Primary_Neurons_D21	HSA_CIRCpedia_48392	N.A.
MMU_CIRCpedia_17497	Mouse (mm10)	Htt	NM_010414	Chr5:34819950â€“34823924	+	0.053	17-20	Ribo-	Primary_Neurons_D21	Species-specific	N.A.
MMU_CIRCpedia_17490	Mouse (mm10)	Htt	NM_010414	Chr5:34817697â€“34826067	+	0.057	14-23	Ribo-	Primary_Neurons_D28	Species-specific	N.A.
MMU_CIRCpedia_212182	Mouse (mm10)	Htt	NM_010414	Chr5:34832566â€“34834388	+	0.028	27-28	Ribo-	Primary_Neurons_D28	HSA_CIRCpedia_48423	N.A.
MMU_CIRCpedia_17487	Mouse (mm10)	Htt	ENSMUST00000148953	Chr5:34811434â€“34813192	+	0.027	11-12	Ribo-	Primary_Neurons_D7	Species-specific	N.A.
MMU_CIRCpedia_17490	Mouse (mm10)	Htt	NM_010414	Chr5:34817697â€“34826067	+	0.027	14-23	Ribo-	Primary_Neurons_D7	Species-specific	N.A.
MMU_CIRCpedia_17475	Mouse (mm10)	Htt	uc008xda.1	Chr5:34782741â€“34799515	+	0.057	2-6	RNase R	R1	HSA_CIRCpedia_48392	N.A.
MMU_CIRCpedia_17497	Mouse (mm10)	Htt	NM_010414	Chr5:34819950â€“34823924	+	0.044	17-20	Ribo-	Somata	Species-specific	N.A.
MMU_CIRCpedia_223381	Mouse (mm10)	Htt	ENSMUST00000148953	Chr5:34790266â€“34799515	+	0.044	3-6	Ribo-	Somata	HSA_CIRCpedia_48404	N.A.
MMU_CIRCpedia_17474	Mouse (mm10)	Htt	uc008xda.1	Chr5:34782741â€“34795971	+	0.044	2-4	Ribo-	Somata	HSA_CIRCpedia_48391	N.A.
MMU_CIRCpedia_225295	Mouse (mm10)	Htt	NM_010414	Chr5:34799376â€“34828624	+	0.044	6-25	Ribo-	Somata	Species-specific	N.A.
MMU_CIRCpedia_17475	Mouse (mm10)	Htt	uc008xda.1	Chr5:34782741â€“34799515	+	0.104	2-6	Ribo-	Synaptosome	HSA_CIRCpedia_48392	N.A.
MMU_CIRCpedia_226010	Mouse (mm10)	Htt	NM_010414	Chr5:34832566â€“34842901	+	0.026	27-29	Ribo-	Synaptosome	HSA_CIRCpedia_102734	N.A.
MMU_CIRCpedia_229396	Mouse (mm10)	Htt	NM_010414	Chr5:34790266â€“34879926	+	0.045	3-47	Ribo-	Testis_14wks	Species-specific	N.A.
